# Supplementary material
Source: PubMed Central journal article supplement (PMC3986184)
Supplement: 1318960111_sd01.pdf [file 1318960111_sd01.pdf]

## Seabirds

|    | authors                                                                                          | year | title                                                                                                                                                                                                                    | journal                                                                                                                                                                                   | volume |
|----|--------------------------------------------------------------------------------------------------|------|--------------------------------------------------------------------------------------------------------------------------------------------------------------------------------------------------------------------------|-------------------------------------------------------------------------------------------------------------------------------------------------------------------------------------------|--------|
| 1  | Agreement on the Conservation of Albatross and Petrels<br>Alaska Fisheries Science Center        | 2004 | Report of the working group on fish stock assessment (extract on incidental mortality)                                                                                                                                   | SC-CCAMLR XIII/4                                                                                                                                                                          |        |
| 2  | Seabird Program                                                                                  | 2005 | Annual Seabird Bycatch Estimates for 2005                                                                                                                                                                                |                                                                                                                                                                                           |        |
| 3  | Alaska Fisheries Science Center                                                                  | 2011 | Preliminary Seabird bycatch estimates for Alaskan groundfish fisheries, 2007-2010                                                                                                                                        |                                                                                                                                                                                           |        |
| 4  | Agnew D.J., Black A.D., Croxall J.P., Parkes G.B.                                                | 2000 | Experimental evaluation of the effectiveness of weighting regimes in reducing seabird by-catch in the longline toothfish fishery around South Georgia.                                                                   | CCAMLR Science                                                                                                                                                                            | 7      |
| 5  | Agnew, D.J.<br>Kirkwood, G. P.                                                                   | 2005 | A statistical method for estimating the level of iuu fishing: application to CCAMLR subarea 48.3                                                                                                                         | CCAMLR Science                                                                                                                                                                            | 12     |
| 6  | Yu. B. Artyukhin, A. V. Vinnikov and D.A. Terentiev                                              | 2006 | Sea Birds and Bottom Longline Fishery in the Kamchatka Region<br>An assessment of CCAMLR measures employed to mitigate seabird mortality in longlining operations for                                                    | Environmental Impact of Fisheries                                                                                                                                                         |        |
| 7  | Ashford, J.R., and J.P. Croxall<br>Bailey, K., P.G. Williams, and D.                             | 1998 | Dissostichus eleginoides around South Georgia                                                                                                                                                                            | CCAMLR Science<br>South Pacific Commission, Oceanic Fisheries Programme.                                                                                                                  | 5      |
| 8  | Itano                                                                                            | 1996 | By-catch and discards in western Pacific tuna fisheries: A review of SPC data holdings and literature.                                                                                                                   | Technical Report No. 34                                                                                                                                                                   |        |
| 9  | Baird, S.J.                                                                                      | 2001 | Report on the International Fishers' Forum on Solving the Incidental Capture of Seabirds in Longline Fisheries                                                                                                           | Auckland, New Zealand. Department of Conservation                                                                                                                                         |        |
| 10 | Baird, S., and D. Thompson                                                                       | 2002 | Seabirds and the hoki ( <i>Macruronus novaezelandiae</i> ) trawl fishery: a review of current knowledge                                                                                                                  | NIWA Client Report No. WLG2002/5                                                                                                                                                          |        |
| 11 | Baird, S.J.                                                                                      | 2004 | Incidental capture of seabird species in commercial fisheries in New Zealand waters, 2001-02                                                                                                                             | New Zealand Fisheries Assessment Report 2004/60                                                                                                                                           |        |
| 12 | Baird, S.J.                                                                                      | 2004 | Incidental capture of seabird species in commercial fisheries in New Zealand waters, 2000-01                                                                                                                             | New Zealand Fisheries Assessment Report 2004/58                                                                                                                                           |        |
| 13 | Baird, S.J.                                                                                      | 2005 | Incidental capture of seabird species in commercial fisheries in New Zealand waters, 2002-03                                                                                                                             | New Zealand Fisheries Assessment Report 2005/2                                                                                                                                            |        |
| 14 | Baker, B., Wise, B.<br>Baker, Double, Gales, Tuck, Abbott,<br>Ryan, Petersen, Robertson,         | 2005 | The impact of pelagic longline fishing on the flesh-footed shearwater <i>Puffinus carneipes</i> in Eastern Australia                                                                                                     | Biological Conservation                                                                                                                                                                   | 126    |
| 15 | Alderman                                                                                         | 2007 | a global assessment of the impact of fisheries-related mortality on shy and white capped albatrosses:<br>Conservation implications                                                                                       |                                                                                                                                                                                           |        |
| 16 | Bakken, V., Falk, K.<br>Barcelona, S.G., J.M. Ortiz de<br>Urbina, J.M. de la Serna, E. Alot, and | 1998 | Incidental take of seabirds in commercial fisheries in the arctic countries                                                                                                                                              |                                                                                                                                                                                           |        |
| 17 | D. Macias<br>Barnes K.N., Ryan P.G., and Baix-<br>Hinzen Ch.                                     | 2010 | Seabird bycatch in Spanish Mediterranean large pelagic longline fisheries 2000-2008                                                                                                                                      | Aquatic Living Resources                                                                                                                                                                  | 23     |
| 18 |                                                                                                  | 1997 | The impact of the hake <i>Merluccius</i> spp. Longline off South Africa on Procellariiform seabirds.<br>Sexual segregation of foraging zones in procellariiform birds: implications of accidental capture on commercial  | Biological Conservation                                                                                                                                                                   | 82     |
| 19 | Bartle, J.                                                                                       | 1990 | fishery longlines of Grey Petrels ( <i>Procellaria cinerea</i> )                                                                                                                                                         | notornis                                                                                                                                                                                  | 37     |
| 20 | Bartle, J.                                                                                       | 1991 | Incidental capture of seabirds in the New Zealand subantarctic squid trawl fishery, 1990                                                                                                                                 | Bird Conservation International                                                                                                                                                           | 1      |
| 21 | Barton J.<br>Beerkircher, L. Brown, C.,<br>Abercrombie, D., Lee, D.                              | 2002 | Fisheries and fisheries management in Falkland Islands Conservation Zones                                                                                                                                                | Aquatic Conservation: Marine and Freshwater Ecosystems                                                                                                                                    | 12     |
| 22 |                                                                                                  | 2005 | Overview of the SEFSC pelagic observer program in the northwest atlantic from 1992-2002                                                                                                                                  | Col. Vol. Sci. Pap. ICCAT                                                                                                                                                                 | 58     |
| 23 | E.J. Belda, A. Sanchez<br>Benjamins, S, D.W. Kulka, and J.                                       | 2001 | Seabird mortality on longline fisheries on the western Mediterranean: factors affecting bycatch and proposed                                                                                                             | Biological Conservation                                                                                                                                                                   | 98     |
| 24 | Lawson                                                                                           | 2008 | Incidental catch of seabirds in Newfoundland and Labrador gillnet fisheries, 2001-2003                                                                                                                                   | Endangered Species Research                                                                                                                                                               | 5      |
| 25 | Bigelow, K.A.<br>Bord Iascaigh Mhara (Irish Sea<br>Fisheries Board - BIM)                        | 2011 | Seabird interaction rates estimated from observer data (2004-2011) in the Hawaii-based shallow and deep-set longline fisheries                                                                                           | Western and Central Pacific Fisheries Commission 7th Regular Session. PIFSC Working Paper WP-11-009<br>Final report to the Commission of the European Communities. EU Contract No. 98/010 |        |
| 26 |                                                                                                  | 2000 | Diversification trials with alternative tuna fishing techniques including the use of remote sensing technology.                                                                                                          |                                                                                                                                                                                           |        |
| 27 | Brothers, N.P., and A.B. Foster                                                                  | 1997 | Seabird catch rates: an assessment of causes and solutions in Australia's domestic tuna longline fishery<br>The influence of environmental variables and mitigation measures on seabird catch rates in the Japanese tuna | Marine Ornithology                                                                                                                                                                        | 25     |
| 28 | Brothers, N., R. Gales, and T. Reid<br>Bugoni, L., Neves, T., Carvalho, D.,<br>Peppes, F.        | 1999 | longline fishery within the Australian Fishing Zone, 1991-1995                                                                                                                                                           | Biological Conservation                                                                                                                                                                   | 88     |
| 29 |                                                                                                  | 2007 | Hook-and-line fisheries in Brazil: Description and impact on seabirds                                                                                                                                                    |                                                                                                                                                                                           |        |

|    |                                                                                                                                                                     |      |                                                                                                                                                                                                                                     |                                                                                                              |      |
|----|---------------------------------------------------------------------------------------------------------------------------------------------------------------------|------|-------------------------------------------------------------------------------------------------------------------------------------------------------------------------------------------------------------------------------------|--------------------------------------------------------------------------------------------------------------|------|
| 30 | Bugoni, L, TS Neves, NO Leite JR, D Carvalho, G Sales, RW Furness, CE Stein, FV Peppes, BB Giffoni, DS Monteiro                                                     | 2008 | Potential bycatch of seabirds and turtles in hook-and-line fisheries of the Itaipava fleet, Brazil<br>Marine turtles, mammals and seabirds captured incidentally by the Spanish surface longline fisheries in the Mediterranean Sea | Fisheries Research 90 (2008) 217-224                                                                         |      |
| 31 | Caminas, J.A. & Valeiras, J. Cardoso, L.G., L. Bugoni, P.L.                                                                                                         | 2001 |                                                                                                                                                                                                                                     | Rapp. Comm. Int. Mer Medit.                                                                                  | 36   |
| 32 | Mancini, and M. Haimovici Carretta, J.V., T. Price, D. Petersen, and R. Read                                                                                        | 2011 | Gillnet fisheries as a major mortality factor of Magellanic penguins in wintering areas                                                                                                                                             | Marine Pollution Bulletin                                                                                    | 62   |
| 33 | John Chardine, Julie Porter, Kenton Wohl                                                                                                                            | 2004 | Estimates of marine mammal, sea turtle, and seabird mortality in the California drift gillnet fishery for swordfish and thresher shark, 1996-2002                                                                                   | Marine Fisheries Review                                                                                      | 66   |
| 34 | Cherel Y., H. Weimerskirch, G. Duhamel                                                                                                                              | 2000 | Workshop on Seabird Incidental Catch in the Waters of Arctic Countries<br>Interactions between longline vessels and seabirds in Kerguelen waters and a method to reduce seabird mortality                                           | Conservation of Arctic Flora and Fauna                                                                       |      |
| 35 |                                                                                                                                                                     | 1996 |                                                                                                                                                                                                                                     | Biological Conservation                                                                                      | 75   |
| 36 | Christensen                                                                                                                                                         | 1995 | Bycatches in the salmon drift net                                                                                                                                                                                                   | International Council for the Exploration. Report of the Baltic Salmon and trout assessment working group    |      |
| 37 | Clemens, A.                                                                                                                                                         | 2006 | Annual report on seabird interactions and mitigation efforts in the Hawaii longline fishery for 2005                                                                                                                                | NMFS PIRO Administrative Report AR-PIRO-05-06                                                                |      |
| 38 | Commonwealth of Australia<br>John Cooper, Nicola Baccetti, Eduardo J. Belda, John J. Borg, Daniel Oro, Costas Papaconstantinou and Antonio Sanchez                  | 2003 | Seabird interactions with longline fisheries in the Australian fishing zone: assessment report for the National Plan of Action for reducing the incidental catch of seabirds in longline fisheries                                  | Australian Government Department of Agriculture, Fisheries and Forestry                                      |      |
| 39 |                                                                                                                                                                     | 2007 | Seabird mortality from longline fishing in the Mediterranean Sea and Macaronesian waters: a review and a way forward                                                                                                                | Scientia Marina<br>Marine and Coastal Management, Department of Environmental Affairs and Tourism, Cape Town | 67   |
| 40 | John Cooper and Peter G. Ryan                                                                                                                                       | 2004 | South African National plan of action for reducing the incidental catch of seabirds in longline fisheries                                                                                                                           |                                                                                                              |      |
| 41 | Mindaugas Dagys, Ramunas Zydulis                                                                                                                                    | 2002 | Bird bycatch in fishing nets in Lithuanian coastal waters in wintering season 2001-2002                                                                                                                                             | Acta Zoologica Lituonica                                                                                     |      |
| 42 | Darby, J.T., and S.M. Dawson                                                                                                                                        | 2000 | Bycatch of yellow-eyed penguins ( <i>Megadyptes antipodes</i> ) in gillnets in New Zealand waters 1979-1997                                                                                                                         | Biological Conservation                                                                                      | 93   |
| 43 | Davoren, G.K.                                                                                                                                                       | 2007 | Effects of gill-net fishing on marine birds in a biological hotspot in the northwest Atlantic                                                                                                                                       | Conservation Biology                                                                                         | 21   |
| 44 | DeGange, A.R., and R.H. Day de la Serna, Jose Miguel Ortiz de Urbina, Jose Maria Garcia Barcelona, Salvador K. Delord N. Gasco H. Weimerskirch C. Barbraud T. Micol | 1991 | Mortality of seabirds in the Japanese land-based gillnet fishery for salmon                                                                                                                                                         | The Condor                                                                                                   | 93   |
| 45 |                                                                                                                                                                     | 2006 | Peces espada en peligro                                                                                                                                                                                                             | Revista Electronica del Instituto Espanol de Oceanografia                                                    | 5    |
| 46 |                                                                                                                                                                     | 2005 | Seabird mortality in the Patagonian toothfish longline fishery around Crozet and Kerguelen islands, 2001-2003                                                                                                                       | CCAMLR Science                                                                                               | 12   |
| 47 | Department of Fisheries and Oceans                                                                                                                                  | 2003 | Status report and future directions towards the development of a national plan of action for the reduction of incidental catch of seabirds in domestic and foreign longline fisheries in Canadian waters                            | Canadian Technical Report of Fisheries and Aquatic Sciences                                                  | 2471 |
| 48 | Department of Fisheries and Oceans                                                                                                                                  | 2007 | National Plan of Action for reducing the incidental catch of seabirds in longline fisheries                                                                                                                                         | Fisheries and Oceans Canada                                                                                  |      |
| 49 | Dietrich, K.S., E.F. Melvin and L. Conquest.                                                                                                                        | 2008 | Integrated weight longlines with paired streamer lines - Best practice to prevent seabird bycatch in demersal longline fisheries                                                                                                    | Biological Conservation                                                                                      | 141  |
| 50 | Dietrich, K.S., and S.M. Fitzgerald                                                                                                                                 | 2010 | Analysis of 2004-2007 vessel-specific seabird bycatch data in Alaska demersal longline fisheries.                                                                                                                                   | AFSC Processed Report 2010-04                                                                                |      |
| 51 | Euan Dunn and Christian Steel                                                                                                                                       | 2001 | The impact of longline fishing on seabirds in the north-east Atlantic: recommendations for reducing mortality                                                                                                                       |                                                                                                              |      |
| 52 | Euan Dunn                                                                                                                                                           | 2007 | The case for a community plan of action for reducing incidental catch of seabirds in longline fisheries                                                                                                                             | Birdlife International                                                                                       |      |
| 53 | Falk, K., and J. Durinck                                                                                                                                            | 1991 | The by-catch of Thick-billed Murres in salmon drift nets off West Greenland in 1988                                                                                                                                                 | Occasional Paper Canadian Wildlife Service                                                                   |      |

|    |                                                                                                                      |      |                                                                                                                                                       |                                                                                                                        |     |
|----|----------------------------------------------------------------------------------------------------------------------|------|-------------------------------------------------------------------------------------------------------------------------------------------------------|------------------------------------------------------------------------------------------------------------------------|-----|
| 54 | Favero M., Khatchikian C.E., Arias A., Silva Rodriguez M.P., Canete G, and Mariano-Jelicich R.                       | 2003 | Estimates of seabird by-catch along the Patagonian Shelf by Argentinean longline fishing vessels, 1999-2001.                                          | Bird Conservation International                                                                                        | 13  |
| 55 | Forney, K.A., S.R. Benson, and G.A. Cameron                                                                          | 2001 | Central California gillnet effort and bycatch of sensitive species, 1990-1998                                                                         | Seabird bycatch: Trends, roadblocks and solutions. E.F. Melvin, and J.K. Parrish (eds). University of Alaska Sea Grant |     |
| 56 | Forsell, D.J.                                                                                                        | 1999 | Mortality of migratory waterbirds in Mid-Atlantic coastal anchored gillnets during March and April 1998                                               | US Fish and Wildlife Service Chesapeake Bay Field Office Administrative Report                                         |     |
| 57 | Gales, R., N. Brothers, and T. Reid Gandini P.A., Frere E., Pettovello                                               | 1998 | Seabird mortality in the Japanese tuna longline fishery around Australia, 1988-1995                                                                   | Biological Conservation                                                                                                | 86  |
| 58 | A.D., Cedrola P.V.                                                                                                   | 1999 | Interaction between Magellanic Penguins and shrimp fisheries in Patagonia, Argentina                                                                  | The Condor                                                                                                             | 101 |
| 59 | Gandini, P., Frere, E.                                                                                               | 2006 | Spatial and temporal patterns in the bycatch of seabirds in the Argentinian longline fishery                                                          |                                                                                                                        |     |
| 60 | Geernaert, T.O., H.L. Gilroy, S.M. Kaimmer, G.H. Williams, and R.J. Trumble                                          | 2001 | A feasibility study that investigates options for monitoring bycatch of short-tailed albatross in the Pacific halibut fishery off Alaska              | NMFS and IPHC                                                                                                          |     |
| 61 | Gilman, E., C. Boggs, and N. Brothers                                                                                | 2003 | Performance assessment of an underwater setting chute to mitigate seabird bycatch in the Hawaii pelagic longline tuna fishery                         | Ocean and Coastal Management                                                                                           | 46  |
| 62 | Gilman, E.                                                                                                           | 2004 | Assessment of strategies to reduce seabird bycatch employed by Hawaii pelagic longline tuna vessels and of observer program data collection protocols | Western Pacific Regional Fishery Management Council                                                                    |     |
| 63 | Gilman, E., N. Brothers, and D. R. Kobayashi                                                                         | 2007 | Comparison of three seabird bycatch avoidance methods in Hawaii-based pelagic longline fisheries                                                      | Fisheries Science                                                                                                      | 73  |
| 64 | Glass N., Lavarello I., Glass J.P., and Ryan P.G.                                                                    | 2000 | Longline fishing at Tristan da Cunha: impacts on seabirds                                                                                             | Atlantic Seabirds                                                                                                      | 2   |
| 65 | Gomez Laich A., M. Favero, R. Mariano-Jelicich, G. Blanco, G. Canete, A. Arias, P. Silva Rodriguez, and H. Brachetta | 2006 | Environmental and operational variability affecting mortality of Black-browed Albatrosses associated with longliners in Argentina                     | Emu                                                                                                                    |     |
| 66 | GonzalesZevallos, D. and Yorio, P.                                                                                   | 2006 | Seabird use of discards and incidental captures at the Argentine hake fishery in the Golfo San Jorge, Argentina                                       | Marine Ecology Progress Series                                                                                         | 316 |
| 67 | Gonzalez-Zevallos, D., Yorio, P., Caille, G.                                                                         | 2007 | Seabird mortality at trawler warp cables and a proposed mitigation measure: A case of study in Golfo San Jorge, Patagonia, Argentina                  | Biological Conservation                                                                                                | 136 |
| 68 | Hale, L.F., L.D. Hollensead, and J.K. Carlson                                                                        | 2007 | Characterization of the shark bottom longline fishery: 2007                                                                                           | NMFS Tech Memo (SEFSC)                                                                                                 | 564 |
| 69 | Nancy Harrison and Mark Robins                                                                                       | 1992 | The threat from nets to seabirds                                                                                                                      | RSPB Conservation Review 6, 1992                                                                                       |     |
| 70 | Hata, D.N.                                                                                                           | 2006 | Incidental captures of seabirds in the US Atlantic pelagic longline fishery, 1986-2005                                                                | NOAA SEFSC                                                                                                             |     |
| 71 | Heinemann, D., N. Klaer, T. Polacheck, G. Tuck and T. Davis                                                          | 2002 | The effects of longlining on seabird populations: by-catch estimation, archival tagging and population modeling                                       | CSIRO Marine Research Final Report AFMA 97/98                                                                          |     |
| 72 | Huang, H.-W., and K.-M. Liu                                                                                          | 2010 | Bycatch and discards by Taiwanese large-scale tuna longline fleets in the Indian Ocean                                                                | Fisheries Research                                                                                                     | 106 |
| 73 | International Fishers Forum                                                                                          | 2002 | Proceedings of the Second International Fishers Forum, November 19-22, 2002. Noreen M. Parks, ed.                                                     |                                                                                                                        |     |
| 74 | International Fishers Forum                                                                                          | 2006 | Proceedings of the International Tuna Fishers Conference on Responsible Fisheries & Third International Fishers Forum, July 25-29, 2005.              |                                                                                                                        |     |
| 75 | Indian Ocean Tuna Commission Jahncke, J. Goya, E.                                                                    | 2006 | Report of the Second Session of the IOTC Working Party on Bycatch Seychelles, 31 July - 1 August 2006.                                                |                                                                                                                        |     |
| 76 | Guillen, A.                                                                                                          | 2001 | Seabird by-catch in small-scale longline fisheries in northern Peru                                                                                   | Waterbirds                                                                                                             | 24  |
| 77 | Jimenez, S, and A. Domingo                                                                                           | 2007 | Albatros y Petreles: su interaccion con la flota de palangre pelagico Uruguaya en el Atlantico Sudoccidental (1998-2006)                              | ICCAT Col. Vol. Sci. Pap.                                                                                              | 60  |
| 78 | Jimenez, S., M. Abreu, M. Pons, M. Ortiz, and A. Domingo                                                             | 2010 | Assessing the impact of the pelagic longline fishery on albatrosses and petrels in the southwest Atlantic                                             | Aquatic Living Resources                                                                                               | 23  |
|    | Gustavo Jiménez-Uzcátegui Jeffrey Mangel Joanna Alfaro-Shigueto                                                      |      |                                                                                                                                                       |                                                                                                                        |     |
| 79 | Dave Anderson                                                                                                        | 2006 | Fishery bycatch of the waved albatross <i>Phoebastria irrorata</i> , a need for implementation of agreements                                          | Galapagos Research                                                                                                     | 64  |
| 80 | Bogdan Kiez, and Teresa Tomek                                                                                        | 1990 | Bird Mortality in Fishing Nets in the Gulf of Gdansk, Polish Baltic Coast                                                                             | Pelagicus                                                                                                              | 5   |

|     |                                                                                                                                |      |                                                                                                                                                                                                                                  |                                                                                                                                                                         |     |
|-----|--------------------------------------------------------------------------------------------------------------------------------|------|----------------------------------------------------------------------------------------------------------------------------------------------------------------------------------------------------------------------------------|-------------------------------------------------------------------------------------------------------------------------------------------------------------------------|-----|
| 81  | Klaer, N.<br>Polacheck, T.                                                                                                     | 1998 | The influence of environmental factors and mitigation measures on by-catch rates of seabirds by Japanese longline fishing vessels in the Australian region                                                                       | Emu                                                                                                                                                                     | 98  |
| 82  | Laich, A., Favero, M., Mariano-Jelicich, R., Blanco, G., Canete, G., Arias, A., Rodriguez, P., Brachetta, H.                   | 2006 | Environmental and Operational Variability affecting the mortality of black-browed albatrosses associated with long-liners in argentina                                                                                           | Emu                                                                                                                                                                     | 106 |
| 83  | Laneri, K., M. Louzao, A. Martinez-Abraín, J.M. Arcos, E.J. Belda, J. Guallart, A. Sanchez, M. Gimenez, R. Maestre, and D. Oro | 2010 | Trawling regime influences longline seabird bycatch in the Mediterranean: new insights from a small-scale fishery                                                                                                                | Marine Ecology Progress Series<br>Proceedings. Fisheries Bycatch: Consequences and Management. Alaska Sea Grant Report 97-02                                            | 420 |
| 84  | Lanza, H.M., and C.R. Griffin                                                                                                  | 1997 | Seabird entanglement by commercial fisheries in the northwestern Atlantic                                                                                                                                                        | Observer data held by the oceanic fisheries programme covering tuna fishery bycatches in the Western and Central Pacific Ocean                                          |     |
| 85  | Lawson, T.                                                                                                                     | 2001 |                                                                                                                                                                                                                                  | Standing Committee on Tuna and Billfish SWG-9                                                                                                                           |     |
| 86  | Nilamon de Oliveira Leite Jr., Carlos Eduardo Stein, João Carlos Alciani Thomé, Tatiana Neves                                  | 2006 | MONITORAMENTO DA PESCA DE CURRICO E ESPINHEL DE SUPERFÍCIE NA LOCALIDADE DE ITAIPAVA/ES E SUA INTERAÇÃO COM TARTARUGAS E AVES MARINHAS.                                                                                          | II Jornada de Conservação e Pesquisa de Tartarugas Marinhas no Atlântico Sul Ocidental<br>14 e 15 de Novembro de 2005 - Praia do Cassino, Brasil                        |     |
| 87  | Lokkeborg & Robertson                                                                                                          | 2002 | Seabird and longline interactions                                                                                                                                                                                                | Biological Conservation                                                                                                                                                 |     |
| 88  | S. Lokkeborg                                                                                                                   | 2003 | Review and evaluation fo three m                                                                                                                                                                                                 | Fisheries Research                                                                                                                                                      | 60  |
| 89  |                                                                                                                                | 2004 | English summary of Fiskeriverket Informerar 2004:8                                                                                                                                                                               |                                                                                                                                                                         |     |
| 90  | Majluf, P., Babcock, E., Riveros, J., Schreiber, M., Alderete, W.                                                              | 2002 | Catch and Bycatch of Sea Birds and Marine Mammals in the Small-Scale Fishery of Punta San Juan, Peru                                                                                                                             | Conservation Biology                                                                                                                                                    | 16  |
| 91  | Manly, B.F.J.                                                                                                                  | 2006 | Incidental catch and interactions of marine mammals and birds in the Cook Inlet salmon driftnet and setnet fisheries                                                                                                             | Cook Inlet Observer Program 1999-2000                                                                                                                                   |     |
| 92  | Manly, B.F.J                                                                                                                   | 2007 | Incidental take and interactions of marine mammals and birds in the Kodiak Island Salmon Set gillnet fishery, 2002 and 2005                                                                                                      | Kodiak Island AMMOP 2002 and 2005                                                                                                                                       |     |
| 93  | de la Mare, W. K.<br>Kerry, K. R.                                                                                              | 1994 | Population Dynamics of the Wandering Albatross ( <i>Diomedea exulans</i> ) on Macquarie Island and the Effects of Mortality from Longline Fishing                                                                                | Polar Biology                                                                                                                                                           | 14  |
| 94  | McVea, T.A. and S.J. Kennelly, eds.<br>Mejuto, J.                                                                              | 2005 | Proceedings of the 4th International Fisheries Observer Conference. Sydney, Australia; 8-11 November 2004.                                                                                                                       |                                                                                                                                                                         |     |
| 95  | Garcia-Cortes, B.<br>Ramos-Cartelle, A.<br>Ariz, J.                                                                            | 2007 | Preliminary overall estimations of bycatch landed by the Spanish surface longline fleet targeting swordfish ( <i>Xiphias gladius</i> ) in the Pacific Ocean and interactions with marine turtles and sea birds: years 1990-2005. | Working group on bycatch. 6th Meeting. La Jolla, California (USA) 9-10 February 2007. Document BYC-6-INF A                                                              |     |
| 96  | Mejuto, J., Garcia-Cortes, B., Ramos-Cartelle, A., Ariz, J.                                                                    | 2007 | Preliminary overall estimations of bycatch landed by the Spanish surface longline fleet targeting swordfish ( <i>Xiphias gladius</i> ) in the Pacific Ocean and interactions with marine turtles and sea birds: years 1990-2005. | Working group on bycatch. 6th Meeting. La Jolla, California (USA) 9-10 February 2007. Document BYC-6-INF A                                                              |     |
| 97  | Melvin, E.F., J.K. Parrish, and L.T. Conquest.                                                                                 | 1999 | Novel tools to reduce seabird bycatch in coastal gillnet fisheries                                                                                                                                                               | Conservation Biology                                                                                                                                                    | 13  |
| 98  | Stehn, R.A., K.S. Rivera, S. Fitzgerald and K.D. Wohl                                                                          | 2001 | Incidental Catch of Seabirds by Longline Fisheries in Alaska                                                                                                                                                                     | in: (eds) E.F. Melvin, and J.K. Parrish. 2001. Seabird Bycatch: trends, roadblocks and solutions. AK-SG-01-01 Fairbanks: University of Alaska Sea Grant College Program |     |
| 99  | Melvin, E.F., J.K. Parrish, K.S. Dietrich, and O.S. Hamel                                                                      | 2001 | Solutions to seabird bycatch in Alaska's demersal longline fisheries                                                                                                                                                             | Final Report                                                                                                                                                            |     |
| 100 | Merkel, F.R.                                                                                                                   | 2004 | Impact of hunting and gillnet fishery on wintering eiders in Nuuk, Southwest Greenland                                                                                                                                           | Waterbirds                                                                                                                                                              | 27  |
| 101 | Mitchell, L                                                                                                                    | 2003 | Birdbycatch                                                                                                                                                                                                                      | Email - Word Doc                                                                                                                                                        |     |
| 102 | Moloney, C. L.<br>Cooper, J.<br>Ryan, P. G.<br>Siegfried, W. R.                                                                | 1994 | Use of a Population-Model to Assess the Impact of Longline Fishing on Wandering Albatross <i>Diomedea exulans</i> Populations                                                                                                    | Biological Conservation                                                                                                                                                 | 70  |
| 103 | Moreno, C.A., R. Hucke-Gaete, and J. Arata                                                                                     | 2003 | Interaccion de la pesqueria del bacalao de profundidad con mamiferos y aves marinas.                                                                                                                                             | Proyecto Fondo de Investigacion Pesquera. No. 2001-31                                                                                                                   |     |
| 104 | Moreno C.A., Arata J.A., Rubilar P., Hucke-Gaete R., Robertson G.                                                              | 2006 | Artisanal longline fisheries in Southern Chile: Lessons to be learned to avoid incidental seabird mortality                                                                                                                      | Biological Conservation                                                                                                                                                 | 127 |

|     |                                                                                   |      |                                                                                                                                                                   |                                                                                                                |     |
|-----|-----------------------------------------------------------------------------------|------|-------------------------------------------------------------------------------------------------------------------------------------------------------------------|----------------------------------------------------------------------------------------------------------------|-----|
| 105 | Murray, S., S. Wanless, and M.P. Harris                                           | 1994 | The Effects of Fixed Salmon ( <i>Salmo salar</i> ) Nets on Guillemot ( <i>Uria aalge</i> ) and Razorbill ( <i>Alca torda</i> ) in Northeast Scotland in 1992.     | Biological Conservation                                                                                        | 70  |
| 106 | Nel, D.C., J.L. Nel, P.G. Ryan, N.T.W. Klages, R.P. Wilson, and G. Robertson      | 2000 | Foraging ecology of grey-headed mollymawks at Marion Island, southern Indian Ocean, in relation to longline fishing activity.                                     | Biological Conservation                                                                                        | 96  |
| 107 | Nel, D., Ryan, P., Watkins, B.                                                    | 2002 | Seabird mortality in the patagonian toothfish longline fishery around the Prince Edward Islands, 1996-2000                                                        | Antarctic Science<br>Albatross Biology and Conservation (eds. Robertson G. and Gales R.)                       | 14  |
| 108 | Neves T., Olmos F.                                                                | 1997 | Albatross mortality in fisheries off the coast of Brazil                                                                                                          | Report                                                                                                         |     |
| 109 | Neves T.S., Olmos F., Pepes F.V.                                                  | 2003 | Plano de Acao nacional para a Conservacao de Albatrozes e Petreis                                                                                                 |                                                                                                                |     |
| 110 | National Marine Fisheries Service                                                 | 2000 | US HI LL seabird data                                                                                                                                             | excel spreadsheet                                                                                              |     |
| 111 | National Marine Fisheries Service                                                 | 2006 | 2006 Annual Report to the Western and Central Pacific Fisheries Commission                                                                                        | PIFSC Data Report DR-06-005                                                                                    |     |
| 112 | National Marine Fisheries Service                                                 | 2006 | Summary of seabird bycatch in Alaskan groundfish fisheries, 1993 through 2004                                                                                     |                                                                                                                |     |
| 113 | Osborne R.F., Mullins P.                                                          | 2001 | Report on the hake longline scientific programme conducted from August to December 2000                                                                           | Report                                                                                                         |     |
| 114 | Osterblom, H., T. Fransson, and O. Olsson                                         | 2002 | Bycatches of common guillemot ( <i>Uria aalge</i> ) in the Baltic Sea gillnet fishery                                                                             | Biological Conservation                                                                                        | 105 |
| 115 | Perez J.A.A, Wahrlich R.                                                          | 2005 | A bycatch of the gillnet monkfish <i>Lophius gastrophysus</i> fishery off southern Brazil                                                                         | Fisheries Research                                                                                             | 72  |
| 116 | Petersen, S.                                                                      | 2005 | Initial bycatch assessment: South Africa's domestic longline fisher, 2000-2003                                                                                    | BirdLife South Africa                                                                                          |     |
| 117 | Samantha Petersen and Steve Kirkman                                               | 2005 | Initial bycatch assessment: demersal longline fishery July 2000-November 2004                                                                                     | BirdLife South Africa                                                                                          |     |
| 118 | Samantha Petersen                                                                 | 2005 | Incidental mortality of seabirds, turtles and sharks: A Review of data collected east of 20 degrees by South African observers                                    | BirdLife South Africa                                                                                          |     |
| 119 | Petersen, X. and Z. McDonell                                                      | 2007 | A Bycatch Assessment of the Cape horse Mackerel Mid-water trawl fishery off South Africa                                                                          | WWF Birdlife South Africa                                                                                      |     |
| 120 | Petersen, S.L., M. Honig, and D.C. Nel                                            | 2008 | The impact of longline fisheries on seabirds in the Benguela current large marine ecosystem                                                                       | ICCAT                                                                                                          | 62  |
| 121 | Phillips, E.M., H.M. Nevins, S.A. Hatch, A.M. Ramey, M.A. Miller, and J.T. Harvey | 2010 | Seabird bycatch in Alaska demersal longline fishery trials: A demographic summary                                                                                 | Marine Ornithology                                                                                             | 38  |
| 122 | John F. Piatt and Patrick J. Gould                                                | 1994 | Post Breeding Dispersal and Drift-net Mortality of Endangered Japanese Murrelets                                                                                  | The Auk                                                                                                        | 3   |
| 123 | Reid T.A., Sullivan B.J., Pompert J., Enticott J.W. and Black A.D.                | 2004 | Seabird mortality associated with Patagonian Toothfish ( <i>Dissostichus eleginoides</i> ) longliners in Falkland Islands waters                                  | Emu                                                                                                            | 104 |
| 124 | River, K.S.                                                                       | 2006 | Seabirds and fisheries in the IATTC area                                                                                                                          | Inter-American Tropical Tuna Commission Working Group to Review Stock Assessments: 7th Mtg Doc SAR-7-05c       |     |
| 125 | Robertson, B.C., and B.L. Chilvers                                                | 2011 | The population decline of the New Zealand sea lion <i>Phocarctos hookeri</i> : a review of possible causes                                                        | Mammal Review<br>Joint Venture Between World Wildlife Fund (UK) and Royal Society for the Protection of Birds. | 41  |
| 126 | Robins, M.                                                                        | 1991 | Synthetic Gill Nets and Seabirds.                                                                                                                                 |                                                                                                                |     |
| 127 | Rogan, E., and M. Mackey                                                          | 2007 | Megafauna bycatch in drift nets for albacore tuna ( <i>Thunnus alalunga</i> ) in the NE Atlantic                                                                  | Fisheries Research                                                                                             | 86  |
| 128 | Romanov, E.V.                                                                     | 2001 | Bycatch in the tuna purse-seine fisheries of the western Indian Ocean                                                                                             | Fishery Bulletin                                                                                               | 100 |
| 129 | Ryan P.G., Boix-Hinzen Ch.                                                        | 1998 | Tuna longline fisheries off Southern Africa: the need to limit seabird bycatch                                                                                    | South African Journal of Science                                                                               | 94  |
| 130 | Ryan, P., Boix-Hinzen, C.                                                         | 1999 | Consistent male-biased seabird mortality in the patagonian toothfish longline fishery                                                                             | The Auk                                                                                                        | 116 |
| 131 | Ryan P.G., Keith D.G., and Kroese M.                                              | 2001 | Seabird bycatch by tuna longline fisheries off southern Africa, 1998-2000                                                                                         | South African Journal of Marine Science                                                                        | 24  |
| 132 | Ryan, Peter G. Watkins, Barry P.                                                  | 2002 | Reducing incidental mortality of seabirds with an underwater longline setting funnel                                                                              | Biological Conservation                                                                                        | 104 |
| 133 | A. Sanchez and E.J. Belda                                                         | 2003 | Bait loss caused by seabirds on longline fisheries in the northwestern Mediterranean: is night setting an effective mitigation measure?                           | Fisheries Research                                                                                             | 60  |
| 134 | Scientific Committee for the Conservation of Antarctic Marine Living Resources    | 2000 | Report of the Nineteenth Meeting of the Scientific Committee                                                                                                      |                                                                                                                |     |
| 135 | Mac V. Rawson                                                                     | 1997 | Fisheries Bycatch Consequences and Management                                                                                                                     | University of Alaska Sea Grant College Program                                                                 |     |
| 136 | Simeone A., Bernal M., Meza J.                                                    | 1999 | Incidental mortality of Humboldt Penguins <i>Spheniscus humboldti</i> in gill nets, central Chile                                                                 | Marine Ornithology                                                                                             | 27  |
| 137 | Soto J.M.R., Colabuono F.I., Filippini A.                                         | 2003 | Analise das capturas de Albatrozes e Petreis (procellariiformes) no espinhel pelagico operante na costa sul do Brasil e ao largo, utilizando medidas mitigadoras. | Resumos do XI Congresso Brasileiro de Ornitologia                                                              |     |

|     |                                                                                                                |      |                                                                                                                                                                                                                                                              |                                                                                                                                                                                  |     |
|-----|----------------------------------------------------------------------------------------------------------------|------|--------------------------------------------------------------------------------------------------------------------------------------------------------------------------------------------------------------------------------------------------------------|----------------------------------------------------------------------------------------------------------------------------------------------------------------------------------|-----|
| 138 | Stagi A., Vaz-Ferreire R., Marin Y., and Joseph L.                                                             | 1997 | The conservation of albatrosses in Uruguayan waters                                                                                                                                                                                                          | Albatross biology and conservation                                                                                                                                               |     |
| 139 | Stempniewicz, L.                                                                                               | 1994 | Marine birds drowning in fishing nets in the Gulf of Gdansk (southern Baltic): numbers, species composition, age and sex structure                                                                                                                           | Ornis Svecica                                                                                                                                                                    | 4   |
| 140 | Strann, K-B, W. Vader, and R. Barrett                                                                          | 1991 | Auk mortality in fishing nets in north Norway                                                                                                                                                                                                                | Seabirds (ed) S. Wanless and M. de L. Brooke                                                                                                                                     | 13  |
| 141 | Sullivan B.                                                                                                    | 2004 | Falkland Islands plan of action for reducing incidental catch of seabirds in trawl fisheries                                                                                                                                                                 | Report                                                                                                                                                                           |     |
| 142 | Sullivan, B.J., T.A. Reid., L. Bugoni                                                                          | 2006 | Seabird mortality on factory trawlers in the Falkland Islands and beyond                                                                                                                                                                                     | Biological Conservation                                                                                                                                                          | 131 |
| 143 | Swarbrick                                                                                                      | 1994 | Investigation of selectivity of static                                                                                                                                                                                                                       | Royal Commission on Environmental Pollution                                                                                                                                      |     |
| 144 | Tamini, L.L., J.E. Perez, G.E. Chiaramonte, H.L. Cappelzozzo                                                   | 2002 | Magelanic Penguin Spheniscus magellanicus and fish as bycatch in the cornalito Sargentinia incisa fishery at Puerto Quequen, Argentina                                                                                                                       | Atlantic Seabirds                                                                                                                                                                | 4   |
| 145 | Christopher W. Thompson, Monique L. Wilson and Darlene DeGhetto                                                | 1998 | Population Characteristics of Common Murres and Rhinoceros Auklets Entangled in Gillnets in Puget Sound, Washington, from 1993 to 1994                                                                                                                       | Northwestern Naturalist                                                                                                                                                          | 79  |
| 146 | Tudela, Sergi                                                                                                  | 2004 | Ecosystem effects of fishing in the Mediterranean: An analysis of the major threats of fishing gear and practices to biodiversity and marine MEDITERRANEAN: AN ANALYSIS OF THE MAJOR THREATS OF FISHING GEAR AND PRACTICES TO BIODIVERSITY AND MARINE HABITS | FAO                                                                                                                                                                              |     |
| 147 | Uhlmann, S.                                                                                                    | 2003 | Fisheries bycatch mortalities of sooty shearwaters ( <i>Puffinus griseus</i> ) and short-tailed shearwaters ( <i>P. tenuirostris</i> ).                                                                                                                      | New Zealand Dept. of Conservation Internal Series#92                                                                                                                             |     |
| 148 | Uhlmann, Sebastian<br>Fletcher, David<br>Moller, Henrik                                                        | 2005 | Estimating incidental takes of shearwaters in driftnet fisheries: lessons for the conservation of seabirds                                                                                                                                                   | Biological Conservation<br>International Council for the Exploration of the Sea (ICES):<br>Theme Session J 17 1: Efficiency, Selectivity and Impacts of<br>Passive Fishing Gears | 123 |
| 149 | Urtans, E. and J. Priednieks                                                                                   | 2000 | The present status of seabirds by-catch in Latvian coastal fishery of Baltic Sea                                                                                                                                                                             |                                                                                                                                                                                  |     |
| 150 | Julio Valeiras and Juan Antonio Caminas                                                                        | 2003 | The incidental capture of seabirds by Spanish drifting longline fisheries in the Western Mediterranean Sea                                                                                                                                                   | Scientia Marina                                                                                                                                                                  | 67  |
| 151 | Roberta S. Wallace, Karen Grzybowski, Edward Diebold, Margaret G. Michaels, J. Andrew Teare and Mary Jo Willis | 1999 | Movements of Humboldt Penguins from a Breeding Colony in Chile                                                                                                                                                                                               | Waterbirds: The International Journal of Waterbird<br>Biology                                                                                                                    | 22  |
| 152 | Watkins, B.P., S.L. Petersen, and P.G. Ryan.                                                                   | 2008 | Interactions between seabirds and deep-water hake trawl gear: an assessment of impacts in South African waters                                                                                                                                               | Animal Conservation                                                                                                                                                              | 11  |
| 153 | Weimerskirch, Henri<br>Capdeville, Didier                                                                      | 2000 | Factors affecting the number and mortality of seabirds attending trawlers and long-liners in the Kerguelen area                                                                                                                                              | Polar Biology                                                                                                                                                                    | 23  |
| 154 | Wienecke, Barbara<br>Robertson, Graham<br>Williams, R.                                                         | 2002 | Seabird and seal -- fisheries interactions in the Australian Patagonian toothfish <i>Dissostichus eleginoides</i> trawl fishery                                                                                                                              | Fisheries Research                                                                                                                                                               | 54  |
| 155 | Capdeville, D.                                                                                                 | 1996 | Seabird interactions with trawl and longline fisheries for <i>Dissostichus eleginoides</i> and <i>Champscephalus gunnari</i>                                                                                                                                 | CCAMLR Science                                                                                                                                                                   | 3   |
| 156 | World Wildlife Fund                                                                                            | 2004 | Driftnet fishery for salmon in the Pacific and its influence on marine ecosystem                                                                                                                                                                             | Environmental IMAC of Fisheries                                                                                                                                                  |     |
| 157 | Yorio, P., G. Caille                                                                                           | 1999 | Seabird interactions with coastal fisheries in Northern Patagonia: use of discards and incidental captures in nets                                                                                                                                           | Waterbirds                                                                                                                                                                       | 22  |

## Marine mammals:

|    | authors                                                                                                                                    | year | title                                                                                                                                                                                                                                                         | journal                                                                                                                                                                                                                            | volume |
|----|--------------------------------------------------------------------------------------------------------------------------------------------|------|---------------------------------------------------------------------------------------------------------------------------------------------------------------------------------------------------------------------------------------------------------------|------------------------------------------------------------------------------------------------------------------------------------------------------------------------------------------------------------------------------------|--------|
| 1  | Abud, C., P. Costa, C. Dimitriadis, V. Franco, P. Laporta, C. Passadore, M. Piedra, and M Szephenyi.                                       | 2007 | Incidental capture of Franciscana dolphins <i>Phocoena blainvilliei</i> in artisanal gillnetting of the Uruguayan coast.                                                                                                                                      | Final Report of the Rufford Marine Laing Foundation<br>En: Arena, G. & M. Rey (eds): Captura de grandes peces pelagicos (pez espada y atunes) en el Atlantico Sudoccidental, y su interaccion con otras poblaciones. INAPE-Uruguay |        |
| 2  | Achaval, F., Y.H. Marin, & L.C. Barea                                                                                                      | 2000 | Captura incidental de tortugas con palangre pelagico oceanico en el atlantico sudoccidental                                                                                                                                                                   |                                                                                                                                                                                                                                    |        |
| 3  | Juan Jose Alava, Maria Jose Barragan, Christina Castro and Raul Carvajal                                                                   | 2005 | A note of strandings and entanglements of humpback whales ( <i>Megaptera novaeangliae</i> ) in Ecudaor                                                                                                                                                        | J. Cetacean Res. Manage.                                                                                                                                                                                                           | 7      |
| 4  | Alfaro-Shigueto, J., Dutton, P., Vega, D., Mangel, J.C., Santillan, L., de Paz, N.                                                         | 2007 | RECORDS OF LEATHERBACK TURTLE BYCATCH FROM PERU                                                                                                                                                                                                               | Proceedings of the Twenty-fourth Annual Symposium on Sea Turtle Biology and Conservation. NOAA Technical Memorandum NMFS-SEFSC-567 (eds R. B. Mast, B. J. Hutchinson & A. H. Hutchinson).                                          |        |
| 5  | Joanna Alfaro Shigueto, Jeffrey C. Mangel and Koen Van Waerebeek                                                                           | 2008 | Small cetacean captures and CPUE estimates in artisanal fisheries operating from a port in Peru, 2005-2007                                                                                                                                                    | IWC Scientific Committee Meeting Santiago, June 2008                                                                                                                                                                               |        |
| 6  | Alio, JJ, LA Marciano, DE Altuve                                                                                                           | 2010 | Incidental capture and mortality of sea turtles in the industrial shrimp trawling fishery of northeastern Venezuela                                                                                                                                           | Ciencias Marinas                                                                                                                                                                                                                   | 36     |
| 7  | Allen, B.M., and R.P. Angliss                                                                                                              | 2011 | Alaska marine mammal stock assessments, 2011                                                                                                                                                                                                                  | NOAA Tech Memo NMFS-AFSC-223                                                                                                                                                                                                       |        |
| 8  | Amande, M.J., J. Ariz, E. Chassot, A. Delgado de Molina, D. Gaertner, H. Murua, R. Pianet, J. Ruiz and P. Chavance                         | 2010 | Bycatch of the European purse seine tuna fishery in the Atlantic Ocean for the 2003-2007 period                                                                                                                                                               | Aquatic Living Resources                                                                                                                                                                                                           | 23     |
| 9  | Amir, O., Berggren, P., Jiddawi, N.                                                                                                        | 2002 | The incidental catch of dolphins in gillnet fisheries in Zanzibar, Tanzania                                                                                                                                                                                   | Western Indian Ocean J. Mar. Sci.                                                                                                                                                                                                  | 1      |
| 10 | Amir, O.A., P. Berggren, and N.S. Jiddawi                                                                                                  | 2007 | Estimates of bycatch of dolphins in Menai Bay, Zanzibar, using onboard observer programmes                                                                                                                                                                    | in. P. Berggre, O.A. Amir, A. Guissamulo, N.S. Jiddawi, Z. Ivgasy, E. Stensland, A. Sarnblad, and V.G. Cockcroft. Sustainable dolphin tourism in East Africa. 2007. Western Indian Ocean Marine Science Association. 72 pp.        |        |
| 11 | Arauz, R.                                                                                                                                  | 2004 | Incidental capture of sea turtles by High seas longline pelagic fisheries in Costa Rica's Exclusive Economic Zone (EEZ) - A second look                                                                                                                       | Proceedings from the 21st Annual Symposium on Sea Turtle Biology and Conservation, Philadelphia, USA                                                                                                                               |        |
| 12 | F Archer<br>T Gerrodette<br>S Chivers<br>A Jackson                                                                                         | 2004 | Annual estimates of the unobserved incidental kill of pantropical spotted dolphin ( <i>Stenella attenuata attenuata</i> ) calves in the turna purse-seine fishery of the eastern tropical Pacific                                                             | Fisheries Bulletin<br>4th Meeting of the Parties to ASCOBANS; Esbjerg, Denmark, 19-22 August 2003                                                                                                                                  | 102    |
| 13 | ASCOBANS                                                                                                                                   | 2003 | MOP4/Doc. 24(S) - Fourth Meeting of the Parties. Resolution No. 6: Incidental Take of Small Cetaceans. Differential distribution within longline transects of loggerhead turtles and swordfish captured by the Spanish Mediterranean surface longline fishery |                                                                                                                                                                                                                                    |        |
| 14 | Baez, J., Real, R., Caminas, J. Baker, C. S., B. L. Chilvers, R. Constantine, S. DuFresne, R. H. Mattlin, A. van Helden, and R. Hitchmough | 2007 | Conservation status of New Zealand marine mammals (suborders Cetacea and Pinnipedia), 2009                                                                                                                                                                    | J. Mar. Biol. Ass. U.K.                                                                                                                                                                                                            | 87     |
| 15 | Bailey, K., P.G. Williams, and D.                                                                                                          | 2010 | Conservation status of New Zealand marine mammals (suborders Cetacea and Pinnipedia), 2009                                                                                                                                                                    | New Zealand Journal of Marine and Freshwater Research<br>44:101-115.                                                                                                                                                               |        |
| 16 | Itano                                                                                                                                      | 1996 | By-catch and discards in western Pacific tuna fisheries: A review of SPC data holdings and literature.                                                                                                                                                        | South Pacific Commission, Oceanic Fisheries Programme. Technical Report No. 34                                                                                                                                                     |        |
| 17 | Baird, S., Bradford, E.                                                                                                                    | 2000 | Estimation of Hector's dolphin bycatch from inshore fisheries, 1997/8 fishing year                                                                                                                                                                            |                                                                                                                                                                                                                                    |        |
| 18 | Banaru, D., I. Dekeyser, G. Imbert, and L. Laubier                                                                                         | 2010 | Non-target and released alive by-catch distributions observed during French driftnet fishery in the northwestern Mediterranean Sea (2000-2003 database)                                                                                                       | Journal of Oceanography, Research and Data                                                                                                                                                                                         | 3      |

|    |                                                                                                                       |      |                                                                                                                                        |                                                                                                                                                                                                                                                                         |    |
|----|-----------------------------------------------------------------------------------------------------------------------|------|----------------------------------------------------------------------------------------------------------------------------------------|-------------------------------------------------------------------------------------------------------------------------------------------------------------------------------------------------------------------------------------------------------------------------|----|
| 19 | Barlow, J., R.L. Brownell, D.P. DeMaster, K.A. Forney, M.S. Lowry, S. Osmeck, T.J. Ragen, R.R. Reeves, and R.J. Small | 1995 | U.S. Pacific marine mammal stock assessments                                                                                           | NOAA Tech Memo NMFS-SWFSC-219                                                                                                                                                                                                                                           |    |
| 20 | Barlow, J., Cameron, G.                                                                                               | 2003 | Field experiments show that acoustic pingers reduce marine mammal bycatch in the California drift net fishery                          | Marine Mammal Science                                                                                                                                                                                                                                                   | 19 |
| 21 | Barton, J.                                                                                                            | 2002 | Fisheries and fisheries management in Falkland Islands Conservation Zones                                                              | Aquatic Conservation                                                                                                                                                                                                                                                    | 12 |
| 22 | Beerkircher, L. Brown, C., Abercrombie, D., Lee, D.                                                                   | 2005 | Overview of the SEFSC pelagic observer program in the northwest Atlantic from 1992-2002                                                | Col. Vol. Sci. Pap. ICCAT                                                                                                                                                                                                                                               | 58 |
| 23 | Harald Benke                                                                                                          | 1994 | A note on cetacean bycatches in German waters                                                                                          | Rep. Int. Whal. Commn.                                                                                                                                                                                                                                                  |    |
| 24 | Simon Berrow, Maria O'Neill, Deirdre Brogan                                                                           | 1998 | Discarding practices and marine mammals by-catch in the Celtic Sea herring fishery                                                     | Biology and Environment: Proceedings of the Royal Irish Academy                                                                                                                                                                                                         | 98 |
| 25 | Berrow, S.D. and E. Rogan                                                                                             | 1998 | Incidental capture of cetaceans in Irish waters                                                                                        | The Irish Naturalists Journal                                                                                                                                                                                                                                           | 26 |
| 26 | Bertozzi, C.P. and A.N. Zerbini                                                                                       | 2002 | Incidental mortality of Franciscana (Pontoporia blainvillei) in the artisanal fishery of Praia Grande, Sao Paulo State, Brazil         | LAJAM                                                                                                                                                                                                                                                                   | 1  |
| 27 | Bord Iascaigh Mhara Irish Sea Fisheries Board                                                                         | 1997 | The Physical Interaction between Grey Seals and Fishing Gear                                                                           | Report to the European Commission DG XIV Reference PEM/93/06                                                                                                                                                                                                            |    |
| 28 | Bord Iascaigh Mhara (Irish Sea Fisheries Board - BIM)                                                                 | 2000 | Diversification trials with alternative tuna fishing techniques including the use of remote sensing technology.                        | Final report to the Commission of the European Communities. EU Contract No. 98/010                                                                                                                                                                                      |    |
| 29 | Bjorge, A., N. Oien, S. Hartvedt, G. Bothun, T. Bekkby                                                                | 2002 | Dispersal and bycatch mortality in gray, Halichoerus gryps, and harbor, Phoca vitulina, seals tagged at the Norwegian coast            | Marine Mammal Science                                                                                                                                                                                                                                                   | 18 |
| 30 | Bordino, P. and D. Albareda                                                                                           | 2004 | Incidental mortality of Franciscana dolphin Pontoporia blainvillei in coastal gillnet fisheries in northern Buenos Aires, Argentina    | IWC working paper SC/56/SM11                                                                                                                                                                                                                                            |    |
| 31 | Bravington, M.V., and K.D. Bisack                                                                                     | 1996 | Estimates of harbour porpoise bycatch in the Gulf of Maine sink gillnet fishery, 1990-1993                                             | Report of the International Whaling Commission National Tuna Fishery Report (NFR-2) presented at the 16th Meeting of the Standing Committee on Tuna and Billfish (9-16 July, 2003, Mooloolaba, Australia). Secretariat of the Pacific Community, Noumea, New Caledonia. | 46 |
| 32 | Bromhead, D. and J. Findlay                                                                                           | 2003 | Tuna and billfish fisheries of the Eastern Australian fishing zone and adjacent high seas.                                             |                                                                                                                                                                                                                                                                         |    |
| 33 | Jose Maria Brotons and Antonio Maria Grau                                                                             | 2008 | Estimating the impact of interactions between bottlenose dolphins and artisanal fisheries in the Balearic Islands                      | Marine Mammal Science                                                                                                                                                                                                                                                   | 24 |
| 34 | Brum, Federico L., and Yamandu H. Marin                                                                               | 2000 | Interacciones entre mamíferos marinos y la pesquería de pez espada Xiphias gladius con palangre pelágico en el Atlántico Sudoccidental | In: Arena, G. & M. Rey (eds): Captura de grandes peces pelágicos (pez espada y atunes) en el Atlántico Sudoccidental, y su interacción con otras poblaciones. INAPE-Uruguay                                                                                             |    |
| 35 | Campbell, R. A., B. L. Chilvers, S. Childerhouse, and N. J. Gales                                                     | 2006 | Conservation management issues and status of the New Zealand (Phocarctos hookeri) and Australian (Neophoca cinerea) sea lion           | Pages 455-469 in A. W. Trites, S. K. Atkinson, D. P. DeMaster, L. W. Fritz, T. S. Gelatt, L. D. Rea, and K. M. Wynne, editors. Sea Lions of the World                                                                                                                   |    |
| 36 | Campbell, R.                                                                                                          | 2007 | Assessing and managing interactions of protected and listed marine species with commercial fisheries in Western Australia              | FRDC Report - Project 2007/059                                                                                                                                                                                                                                          |    |
| 37 | Caminas, J.A. & Valeiras, J. Capella Alzueta, J. Florez-Gonzalez, L.                                                  | 2001 | Marine turtles, mammals and seabirds captured incidentally by the Spanish surface longline fisheries in the Mediterranean Sea          |                                                                                                                                                                                                                                                                         |    |
| 38 | Falk Fernandez, P.                                                                                                    | 2001 | Mortality and anthropogenic harassment of humpback whales along the Pacific coast of Colombia                                          | Memoirs of the Queensland Museum                                                                                                                                                                                                                                        | 47 |
| 39 | Capella, Juan, Florez-Gonzalez, L., Herrera, Julio                                                                    | 2007 | Captura incidental e intencional de grandes cetáceos en Colombia                                                                       | Memorias del Taller de Trabajo sobre el Impacto de las Actividades Antropogénicas en Mamíferos Marinos en el Pacífico Sudeste. Bogotá, Colombia, 28 al 29 de noviembre de 2006. Guayaquil, Ecuador.                                                                     |    |
| 40 | Falk, Patricia, Tobon, Isabel C.                                                                                      | 2007 |                                                                                                                                        |                                                                                                                                                                                                                                                                         |    |
| 41 | Cappozzo, H.L., M.F. Negri, F.H. Perez, D. Albareda, F. Monzon, and J.F. Corcuera                                     | 2001 | Incidental mortality of Franciscana dolphin (Pontoporia blainvillei) in Argentina                                                      | Latin American Journal of Aquatic Mammals                                                                                                                                                                                                                               | 6  |
| 42 | John K. Carlson                                                                                                       | 2001 | The Directed Shark Gillnet Fishery: Right Whale Season, 2001                                                                           | Nation Marine Fisheries Service                                                                                                                                                                                                                                         |    |
| 43 | John K. Carlson and Ivy Baremore                                                                                      | 2002 | The Directed Shark Gillnet Fishery: Non-Right Whale Season, 2002                                                                       | National Marine Fisheries Service                                                                                                                                                                                                                                       |    |
| 43 | John K. Carlson and Ivy E. Baremore                                                                                   | 2003 | The Directed Shark Gillnet Fishery: Catch and Bycatch, 2003                                                                            | National Marine Fisheries Service                                                                                                                                                                                                                                       |    |



|    |                                                                                                                                                  |      |                                                                                                                                                                         |                                                                                                                                                             |    |
|----|--------------------------------------------------------------------------------------------------------------------------------------------------|------|-------------------------------------------------------------------------------------------------------------------------------------------------------------------------|-------------------------------------------------------------------------------------------------------------------------------------------------------------|----|
| 44 | Carretta, J.V., J. Barlow, K.A. Forney, M.M. Muto, and J. Baker                                                                                  | 2001 | U.S. Pacific marine mammal stock assessments: 2001                                                                                                                      | NOAA Tech Memo NMFS-SWFSC-317                                                                                                                               |    |
| 45 | Carretta, J.V., T. Price, D. Petersen, and R. Read                                                                                               | 2004 | Estimates of marine mammal, sea turtle and seabird mortality in the California drift gillnet fishery for swordfish and thresher shark, 1996-2002                        | Marine Fisheries Review                                                                                                                                     | 66 |
| 46 | Carretta, J.V., and J. Barlow                                                                                                                    | 2011 | Long-term effectiveness, failure rates, and "dinner bell" properties of acoustic pingers in a gillnet fishery                                                           | Marine Technology Society Journal                                                                                                                           | 45 |
| 47 | Carretta, J.V., K.A. Forney, E. Oleson, K. Martien, M.M. Muto, L. Carswell, R.L. Brownell Jr., J. Robbins, D.K. Mattila, K. Ralls, and M.C. Hill | 2011 | U.S. Pacific marine mammal stock assessments: 2010                                                                                                                      | NOAA Tech Memo NMFS-SWFSC-476                                                                                                                               |    |
| 48 | Commission of the European Communities                                                                                                           | 2002 | Incidental Catches of Small Cetaceans - Commission Staff Working Paper.                                                                                                 | Report of the Second Meeting of the Subgroup on Fishery and Environment (SGFEN) of the Scientific, Technical, and Economic Committee for Fisheries (STECF). |    |
| 49 | Chivers, Susan J.                                                                                                                                | 2002 | Age structure of female Eastern spinner dolphins ( <i>Stenella longirostris orientalis</i> ) incidently killed in the Eastern Tropical Pacific tuna purse-seine fishery | Administrative Report LJ-02-11                                                                                                                              |    |
| 50 |                                                                                                                                                  |      |                                                                                                                                                                         | Southwest Fisheries Science Center, NMFS, NOAA                                                                                                              |    |
| 51 | Chilvers, B. Louise                                                                                                                              | 2008 | New Zealand sea lions <i>Phocarcotos hookeri</i> and squid trawl fisheries: bycatch problems and management options                                                     | Endangered Species Research, Vol. 5: 193–204, 2008                                                                                                          |    |
| 52 | Couperus, A.S.                                                                                                                                   | 1997 | Interactions Between Dutch Midwater Trawl and Atlantic White-sided Dolphins ( <i>Lagenorhynchus acutus</i> ) Southwest of Ireland                                       | Journal of Northwest Atlantic Fishery Science                                                                                                               | 22 |
| 53 | Couperus, A.S.                                                                                                                                   | 1997 | By-catch of marine mammals and discards in pelagic fisheries (MAMDIS).                                                                                                  | Report #CFP 94/018 - Agricultural Research Department, Netherlands Institute for Fisheries Research.                                                        |    |
| 54 | Couperus, A.S.                                                                                                                                   | 2007 | Monitoring of incidental catches of cetaceans by Dutch pelagic trawlers in 2006.                                                                                        | Centre for Fishery Research 07.004                                                                                                                          |    |
| 55 | Crespo, E.A., Pedraza, S.N., Dans, S.L., Alonso, M.K., Reyes, L.M., Garcia, N.A., Coscarella, M.                                                 | 1997 | Direct and indirect effects of the highseas fisheries on the marine mammal populations in the northern and central Patagonian coast                                     | Journal of Northwest Atlantic Fisheries Science                                                                                                             | 22 |
| 56 | Crowder, L.B. and R.A. Myers                                                                                                                     | 2001 | A Comprehensive Study of the Ecological Impacts of the Worldwide Pelagic Longline Industry.                                                                             | 2001 First Annual Report to the Pew Charitable Trusts.                                                                                                      |    |
| 57 | D'Agrosa, Caterina, Lennert-Cody, Cleridy E., Vidal, Omar de la Serna, Jose Miguel Ortiz de Urbina, Jose Maria Garcia Barcelona, Salvador        | 2000 | Vaquita Bycatch in Mexico's Artisanal Gillnet Fisheries: Driving a Small Population to Extinction                                                                       | Conservation Biology                                                                                                                                        | 14 |
| 58 | Denuncio, R., R. Bastida, M. Dassis, G. Giardino, M. Gerpe, and D. Rodriguez                                                                     | 2006 | Peces espada en peligro                                                                                                                                                 | Revista Electronica del Instituto Espanol de Oceanografia                                                                                                   | 5  |
| 59 |                                                                                                                                                  | 2011 | Plastic ingestion in Franciscana dolphins, <i>Pontoporia blainvillei</i> (Gervais and d'Orbigny, 1844), from Argentina                                                  | Marine Pollution Bulletin                                                                                                                                   | 62 |
| 60 | Di Benedetto, A.P.M.                                                                                                                             | 2003 | Interactions between gillnet fisheries and small cetaceans in northern Rio de Janeiro, Brazil: 2001-2002                                                                | LAJAM                                                                                                                                                       | 2  |
| 61 | Euan Dunn                                                                                                                                        | 2007 | The case for a community plan of action for reducing incidental catch of seabirds in longline fisheries                                                                 | Birdlife International                                                                                                                                      |    |
| 62 | Fairfield, C., and L.P. Garrison                                                                                                                 | 2008 | Estimated bycatch of marine mammals and sea turtles in the U.S. Atlantic pelagic longline fleet during 2007                                                             | NOAA Tech Memo NMFS-SEFSC-572                                                                                                                               |    |
| 63 | Fairfield-Walsh, C., and L.P. Garrison                                                                                                           | 2006 | Estimated bycatch of marine mammals and turtles in the U.S. Atlantic pelagic longline fleet during 2005                                                                 | NOAA Tech Memo NMFS-SEFSC-539                                                                                                                               |    |
| 64 | Fairfield-Walsh, C., and L.P. Garrison                                                                                                           | 2007 | Estimated bycatch of marine mammal and turtles in the U.S. Atlantic pelagic longline fleet during 2006.                                                                 | NOAA Tech Memo NMFS-SEFSC-560                                                                                                                               |    |
| 65 | Fernando Felix and Jorge Samaniego                                                                                                               | 1994 | Incidental Catches of Small Cetaceans in the Artisanal Fisheries of Ecuador                                                                                             | Rep. Int. Whal. Commn.                                                                                                                                      |    |
| 66 | Fernando Felix, Ben Haase, Jay W. Davis, David Chiluiza and Paola Amador                                                                         | 1997 | A Note on Recent Strandings and Bycatches of Sperm Whales ( <i>Physeter macrocephalus</i> ) and Humpback Whales ( <i>Megaptera novaeangliae</i> ) in Ecuador.           | Rep. Int. Whal. Commn.                                                                                                                                      | 47 |
| 67 | Fernando Felix, Mercedes Munoz and Ben Haase                                                                                                     | 2006 | Bycatch of Humpback Whales in Artisanal Fishing Gear in Ecuador During 2005.                                                                                            | IWC workshop April 2006                                                                                                                                     |    |
| 68 | Forney, K.A., S.R. Benson, and G.A. Cameron                                                                                                      | 2001 | Central California gillnet effort and bycatch of sensitive species, 1990-1998                                                                                           | Seabird bycatch: Trends, roadblocks, and solutions. E.F. Melvin, and J.K. Parrish (ed). University of Alaska Sea Grant                                      |    |

|    |                                                                                                                                                                                                 |      |                                                                                                                                                                                                                                                  |                                                                                                                                                              |      |
|----|-------------------------------------------------------------------------------------------------------------------------------------------------------------------------------------------------|------|--------------------------------------------------------------------------------------------------------------------------------------------------------------------------------------------------------------------------------------------------|--------------------------------------------------------------------------------------------------------------------------------------------------------------|------|
| 69 | Forney, K.A., and D.R. Kobayashi<br>Fortuna, C.M., C. Vallini, E. Filidei Jr.,<br>M. Ruffino, I. Consalvo, S. Di<br>Muccio, C. Gion, U. Scacco, E.<br>Tarulli, O. Giovanardi, and A.<br>Mazzola | 2007 | Updated estimates of mortality and injury of cetaceans in the Hawaii-based longline fishery, 1994-2005                                                                                                                                           | NOAA Tech Memo NMFS SWFSC                                                                                                                                    | 412  |
| 70 | Jean-Mark Fromentin and Henri<br>Farrugio                                                                                                                                                       | 2010 | By-catch of cetaceans and other species of conservation concern during pair trawl fishing operations in the Adriatic Sea (Italy)                                                                                                                 | Chemistry and Ecology (Suppl.)                                                                                                                               | 26   |
| 71 |                                                                                                                                                                                                 | 2005 | Results of the 2003 observer program on board the French purse seiner targeting the atlantic bluefin tuna in the Mediterranean sea                                                                                                               | Col. Vol. Sci. Pap. ICCAT                                                                                                                                    | 58   |
| 72 | Garrison, L.P.                                                                                                                                                                                  | 2003 | Estimated bycatch of marine mammals and turtles in the U.S. Atlantic pelagic longline fishery during 2001-2002.                                                                                                                                  | NOAA technical Memorandum NOAA Fisheries-SEFSC-515                                                                                                           |      |
| 73 | Lance Garrison                                                                                                                                                                                  | 2003 | Protected Species Interactions with the directed shark gillnet fishery of Florida and Georgia from 1992-2002                                                                                                                                     | SEFSC, Miami Laboratory                                                                                                                                      |      |
| 74 | Garrison, L.P. and P.M. Richards                                                                                                                                                                | 2004 | Estimated bycatch of marine mammals and turtles in the U.S. Atlantic pelagic longline fleet during 2003                                                                                                                                          | NOAA Tech Memo NMFS-SEFSC-527                                                                                                                                |      |
| 75 | Garrison, L.P.                                                                                                                                                                                  | 2005 | Estimated bycatch of marine mammals and turtles in the U.S. Atlantic pelagic longline fleet during 2004                                                                                                                                          | NOAA Tech Memo NMFS-SEFSC-531                                                                                                                                |      |
| 76 | Garrison, L.P., L. Stokes, and C.<br>Fairfield                                                                                                                                                  | 2009 | Estimated bycatch of marine mammals and sea turtles in the U.S. Atlantic pelagic longline fleet during 2008                                                                                                                                      | NOAA Tech Memo NMFS-SEFSC-591                                                                                                                                |      |
| 77 | Goldsworthy, S., Hamer, D., Page, B.                                                                                                                                                            | 2007 | Assessment of the implications of interactions between fur seals & sea lions & the southern rock lobster & gillnet sector of the Southern and Eastern Scalefish and Shark Fishery (SESSF) in SA                                                  | SARDI Aquatic Sciences Publication No. F2007/000711.<br>SARDI Research Report Series No. 225                                                                 |      |
| 78 | Goldsworthy, D. Page<br>Gonener, S., and S. Bilgin                                                                                                                                              | 2007 | A risk-assessment approach to evaluating the significance of seal bycatch in two Australian fisheries                                                                                                                                            | Biological Conservation 139: 269-285                                                                                                                         |      |
| 79 |                                                                                                                                                                                                 | 2009 | The effects of pingers on harbour porpoise, Phocoena phocoena, bycatch and fishing effort in the turbot gill net fishery in the Turkish Black Sea Coast                                                                                          | Turkish Journal of Fisheries and Aquatic Sciences                                                                                                            | 9    |
| 80 | Greenland, J.A., and C.J. Limpus                                                                                                                                                                | 2005 | Marine wildlife stranding and mortality database annual report 2004. I. Dugong                                                                                                                                                                   | Conservation technical and data report                                                                                                                       | 2004 |
| 81 | Greenland, J.A., and C.J. Limpus                                                                                                                                                                | 2006 | Marine wildlife stranding and mortality database annual report 2005. I. Dugong                                                                                                                                                                   | Conservation technical and data report                                                                                                                       | 2005 |
| 82 | Greenland, J.A., and C.J. Limpus                                                                                                                                                                | 2008 | Marine wildlife stranding and mortality database annual report 2007. I. Dugong                                                                                                                                                                   | Conservation technical and data report                                                                                                                       | 2007 |
| 83 | Greenland, J.A., and C.J. Limpus                                                                                                                                                                | 2010 | Marine wildlife stranding and mortality database annual report 2008. I. Dugong                                                                                                                                                                   | Conservation technical and data report                                                                                                                       | 2010 |
| 84 | Gribble, N.A., G. McPherson, and B.<br>Lane                                                                                                                                                     | 1998 | Effect of the Queensland shark control program on non-target species: whale, dugong, turtle and dolphin: a review.                                                                                                                               | Marine Freshwater Research                                                                                                                                   | 49   |
| 85 | Ben Haase and Fernando Felix                                                                                                                                                                    | 1994 | A Note of the Incidental Mortality of Sperm Whales (Physeter macrocephalus) in Ecuador<br>Harbour porpoise interactions with the 2001 selective salmon fisheries in southern Brazil Columbia and license holder reported small cetacean by-catch | Rep. Int. Whal. Commn.<br>Selective Salmon Fisheries Science Program Report.<br>Fisheres and Ocean Canada                                                    |      |
| 86 | Hall, A., G. Ellis, and A.W. Trites                                                                                                                                                             | 2002 |                                                                                                                                                                                                                                                  |                                                                                                                                                              |      |
| 87 | Hamer, D.J., Ward, T.M.,<br>Goldsworthy, S.D., McGarvey, R.<br>and Rogers, P.J.                                                                                                                 | 2007 | Measurement and Mitigation of Operational Interactions between the South Australian Sardine Fishery and Common Dolphins Conservation Biology Report to PIRSA Fisheries                                                                           | SARDI Aquatic Sciences Publication No.F2006/000212.<br>SARDI Research Report Series No. 174.                                                                 |      |
| 89 | Hamer, D. et al                                                                                                                                                                                 | 2007 | Operational interactions between the South Australian Sardine Fishery and Common Dolphins in 2006-07: assessing the effectiveness of the industry Code of Practice                                                                               | SARDI Aquatic Sciences Publication No. F2007/001098.<br>SARDI Research Report Series No. 252                                                                 |      |
| 90 | Hamer, D.J., T.M. Ward, and R.<br>McGarvey                                                                                                                                                      | 2008 | Measurement, management, and mitigation of operational interactions between the South Australian Sardine Fishery and short-beaked common dolphin (Delphinus delphis)                                                                             | Biological Conservation                                                                                                                                      | 141  |
| 91 | Hamer, D.J., Ward, T.M.,<br>Goldsworthy, S.D., and<br>Shaughnessy, P.D                                                                                                                          | 2009 | Effectiveness of the Great Australian Bight Marine Park in protecting the Australian sea lion (Neophoca cinerea) from by-catch mortality in shark gill-nets.                                                                                     | Report to Great Australian Bight Marine Park Steering Committee. SARDI Aquatic Sciences Publication No. F2009/000227-1, SARDI Research Report Series No. 357 |      |
| 92 |                                                                                                                                                                                                 |      |                                                                                                                                                                                                                                                  |                                                                                                                                                              |      |
| 93 | D.J. Hamer, S.D. Goldsworthy, D.P.<br>Costa, S.L. Fowler, B. Page, and<br>M.D. Sumner                                                                                                           | 2013 | The endangered Australian sea lion extensively overlaps with and regularly becomes by-catch in demersal shark gill-nets in South Australian shelf waters                                                                                         | Biological Conservation 157: 386-400                                                                                                                         |      |
| 94 | Hammond et al                                                                                                                                                                                   | 1995 | Distribution and abundance of small cetaceans in the North Sea adjacent waters: a review of existing information                                                                                                                                 |                                                                                                                                                              |      |
| 95 | Hanson, D.L.                                                                                                                                                                                    | 1999 | 22. Management of shark fisheries off the west coast of the USA                                                                                                                                                                                  | in. Case studies of the management of elasmobranch fisheries. (ed.) R. Shotton. FAO                                                                          | 378  |
| 96 | Hill, P.S., and D.P. DeMaster                                                                                                                                                                   | 1998 | Alaska marine mammal stock assessments, 1998                                                                                                                                                                                                     | NOAA Tech Memo NMFS-AFSC-97                                                                                                                                  |      |

|     |                                                                                                                                                                                |      |                                                                                                                                                                                                      |                                                                                                                            |     |
|-----|--------------------------------------------------------------------------------------------------------------------------------------------------------------------------------|------|------------------------------------------------------------------------------------------------------------------------------------------------------------------------------------------------------|----------------------------------------------------------------------------------------------------------------------------|-----|
| 97  | Hodgson, A., H. Marsh, S. Delean, and L. Marcus                                                                                                                                | 2007 | Is attempting to change marine mammal behaviour a generic solution to the bycatch problem? A dugong case study                                                                                       | Animal Conservation                                                                                                        | 10  |
| 98  | Hooker, S.K., R.W. Baird, and M.A. Showell                                                                                                                                     | 1997 | Cetacean strandings and bycatches in Nova Scotia, Eastern Canada, 1991-1996                                                                                                                          | International Whaling Commission Document. SC/49/05                                                                        |     |
| 99  | Hooper, J. Clark, J. M. Charman, C. Agnew, D.J.                                                                                                                                | 2005 | Seal mitigation measures on trawl vessels fishing for krill in CCAMLR Subarea 48.3                                                                                                                   | CCAMLR Science                                                                                                             | 12  |
| 100 | ICES SGBYC                                                                                                                                                                     | 2008 | Report of the study group for bycatch of protected species (SGBYC)                                                                                                                                   | ICES CM 2008/ACOM: 48                                                                                                      |     |
| 101 | Iniguez, M., Hevia, M., Gasparrou, C., Tomsin, A., Secchi, E.                                                                                                                  | 2003 | Preliminary estimate of incidental mortality of Commerson's Dolphins ( <i>Cephalorhynchus commersonii</i> ) in artisanal setnet fishery in la angelina beach and ria gallegos, santa cruz, argentina | LAJAM                                                                                                                      | 2   |
| 102 | Indian Ocean Tuna Commission                                                                                                                                                   | 2006 | Report of the Second Session of the IOTC Working Party on Bycatch Seychelles, 31 July - 1 August 2006.                                                                                               |                                                                                                                            |     |
| 103 | A.A. Jayaprakash, P. Nammalwar, S. Krishna Pillai and M.N.K. Elayath                                                                                                           | 1995 | Incidental by-catch of dolphins at fisheries harbour, Cochin with a note on their conservation and management in India                                                                               | Journal of the Marine Biological Association of India                                                                      | 37  |
| 104 | Karamanlidis, A.A., E. Androukaki, S. Adamantopoulou, A. Chatzisprou, W.M. Johnson, S. Kotomatas, A. Papaopoulos, V. Paravas, G. Paximadis, R. Pires, E. Tounta, P. Dendrinios | 2008 | Assessing accidental entanglement as a threat to the Mediterranean monk seal <i>Monachus monachus</i>                                                                                                | Endangered Species Research                                                                                                | 5   |
| 105 | Kaschner                                                                                                                                                                       | 2001 | Review of small cetacean bycatch                                                                                                                                                                     | 4th Meetings of the Parties (MOP 4)                                                                                        |     |
| 106 | Carl Kinze                                                                                                                                                                     | 1994 | Incidental catches of harbour porpoises in Danish waters 1986-1989                                                                                                                                   | Rep. In. Whal. Comm                                                                                                        |     |
| 107 | Kirkwood, J.K., P.M. Bennett, P.D. Jepson, T. Kuiken, V.R. Simpson, and J.R. Baker                                                                                             | 1997 | Entanglement in fishing gear and other causes of death in cetaceans stranded on the coasts of England and Wales                                                                                      | Veterinary Record                                                                                                          | 141 |
| 108 | Kiszka, J. and C. Muir, eds.                                                                                                                                                   | 2007 | Incidental catch of non-targeted marine species in the Western Indian Ocean: problems and mitigation measures.                                                                                       | Workshop Proceedings: 13-15 November 2006, Mayotte, France                                                                 |     |
| 109 | On the by-catch of harbour porpoise ( <i>Phocoena phocoena</i> ) in German fisheries in the Baltic and the North Sea                                                           | 1996 | Kock, K.H. and H. Benke                                                                                                                                                                              | Archive of Fishery and Marine Research                                                                                     | 44  |
| 110 | Krishnan, A.A., K.S. Yousuf, P.L. Kumaran, N. Harish, B. Anoop, V.V. Afsal, M. Rajagopalan, E. Vivekanandan, P.K. Krishnakumar, and R. Jayasankar                              | 2008 | Stomach contents of cetaceans incidentally caught along Mangalore and Chennai coasts of Indian                                                                                                       | Estaurine, Coastal, and Shelf Science                                                                                      | 76  |
| 111 | Kuiken, T., V.R. Simpson, C.R. Allchin, P.M. Bennett, G.A. Codd, E.A. Harris, G.J. Howes, S. Kennedy, J.K. Kirkwood, R.J. Law, N.R. Merrett, and S. Phillips                   | 1994 | Mass mortality of common dolphins ( <i>Delphinus delphis</i> ) in southwest England due to incidental capture in fishing gear.                                                                       | Veterinary Record                                                                                                          | 134 |
| 112 | Finn Larsen                                                                                                                                                                    | 1999 | The Effect of Acoustic Alarms on the bycatch of harbour porpoises in the Danish North Sea gill net fishery                                                                                           | Paper SC/51/SM41 - International Whaling Commission Scientific Committee                                                   |     |
| 113 | Finn Larsen                                                                                                                                                                    | 2000 | Improving the mechanism of pinger attachment for the Danish North Sea gill net fishery.                                                                                                              |                                                                                                                            |     |
| 114 | Larsen, F., M. Vinther, and C. Krog                                                                                                                                            | 2002 | Use of pingers in the Danish North Sea wreck net fishery.                                                                                                                                            | International Whaling Commission Scientific Committee - Report #SC/54/SM32 (unpublished)                                   |     |
| 115 | Laurent, L., Caminas, J.A., Casale, P., Delforio, M., DeMetrio, G., Kapantagakis, A., Margaritoulis, D. Politou, C-Y, Valeiras, J.                                             | 2001 | Assessing marine turtle bycatch in European drifting longline and trawl fisheries for identifying fishing regulations                                                                                | Project-EC-DG Fisheries 98-008. EU Commission Report, Joint project of BIOINSIGHT, IEO, IMBC, STPS and University of Bari. |     |
| 116 | Lawson, T.                                                                                                                                                                     | 2001 | Methods for analysing bycatches with observer data.                                                                                                                                                  | SCTB14 Working Paper, SWG-10: Oceanic Fisheries Programme, Secretariat of the Pacific Community.                           |     |

|     |                                                                                                                                           |      |                                                                                                                                                                                                                             |                                                                                                |     |
|-----|-------------------------------------------------------------------------------------------------------------------------------------------|------|-----------------------------------------------------------------------------------------------------------------------------------------------------------------------------------------------------------------------------|------------------------------------------------------------------------------------------------|-----|
| 117 | Lawson, T.                                                                                                                                | 2001 | Observer data held by the oceanic fisheries programme covering tuna fishery bycatches in the Western and Central Pacific Ocean                                                                                              | Standing Committee on Tuna and Billfish SWG-9                                                  |     |
| 118 | Leeney et al                                                                                                                              | 2008 | Spatio-temporal analysis of cetacean                                                                                                                                                                                        | Biodiversity and Conservation                                                                  |     |
| 119 | Cecilia Lezama, Philip Miller, Alejandro Fallabrino                                                                                       | 2003 | Informe Final. IMPACTO DE LA PESQUERÍA ARTESANAL URUGUAYA EN LAS POBLACIONES DE TORTUGAS MARINAS                                                                                                                            |                                                                                                |     |
| 120 | Liu, L.-L., S.-J. Chen, L.-S. Chou, C.-D. Dong nd C.-W. Chen                                                                              | 2003 | Accumulation of Butyltin compounds in the pantropical spotted dolphin, <i>Stenella attenuata</i>                                                                                                                            | Journal of Food and Drug Analysis                                                              | 11  |
| 121 | Lopez-Mendilaharsu M, Bauza A, Laporta M, Caraccio MN, Lezama C, Calvo V, Hernandez M, Estrades A, Aisenberg A, Fallabrino A.             | 2003 | Review and conservation of sea turtles in Uruguay.                                                                                                                                                                          | Final Report: British Petroleum Conservation Programme & National Fish and Wildlife Foundation |     |
| 122 | A. Lopez et al.                                                                                                                           | 2003 |                                                                                                                                                                                                                             | Biological Conservation                                                                        | 111 |
| 123 | Lopez, B.D. Lopez-Mendilaharsu M, Bauza A, Laporta M, Caraccio MN, Lezama C, Calvo V, Hernandez M, Estrades A, Aisenberg A, Fallabrino A. | 2006 | Interactions between Mediterranean bottlenose dolphins ( <i>Tursiops truncatus</i> ) and gillnets off Sardinia, Italy                                                                                                       | Ices Journal of Marine Science                                                                 | 63  |
| 124 | Lopez-Mendilaharsu, M., G. Sales, B. Giffoni, P. Miller, F. Niemeyer                                                                      | 2003 | Review and conservation of sea turtles in Uruguay.                                                                                                                                                                          | Final Report: British Petroleum Conservation Programme & National Fish and Wildlife Foundation |     |
| 125 | Fiedler, and A. Domingo.                                                                                                                  | 2007 | Distribucion y composicion de tallas de las tortugas marinas ( <i>Caretta caretta</i> y <i>Dermochelys coriacea</i> ) que interactuan con el palangre pelagico en el Atlantico Sur. Col. Vol. Sci. Pap. ICCAT 60:2094-2109. |                                                                                                |     |
| 126 |                                                                                                                                           | 2004 | English summary of Fiskeriverket Informerar 2004:8                                                                                                                                                                          |                                                                                                |     |
| 127 | Lunneryd, S.G., and S. Konigson Majluf, P., Babcock, E., Riveros, J.,                                                                     | 2005 | By-catch of seals in Swedish commercial fisheries                                                                                                                                                                           | Symposium on Biology and Management of Seals in the Baltic area. 15-18 February, Helsinki      |     |
| 128 | Schreiber, M., Alderete, W.                                                                                                               | 2002 | Catch and Bycatch of Sea Birds and Marine Mammals in the Small-Scale Fishery of Punta San Juan, Peru                                                                                                                        | Conservation Biology                                                                           | 16  |
| 129 | Mangel, J.C., J. Alfaro-Shigueto, K. Van Waerebeek, C. Caceres, S. Bearhop, M.J. Witt, and B.J. Godley                                    | 2010 | Small cetacean captures in Peruvian artisanal fisheries: high despite protective legislation                                                                                                                                | Biological Conservation                                                                        | 143 |
| 130 | Manly, B.F.J.                                                                                                                             | 2006 | Incidental catch and interactions of marine mammals and birds in the Cook Inlet salmon driftnet and setnet fisheries, 1999-2000                                                                                             | Cook Inlet Observer Program, 1999-2000                                                         |     |
| 131 | Mansur, E.F., B.D. Smith, R.M. Mowgli, and M.A.A. Diyan                                                                                   | 2008 | Two incidents of fishing gear entanglements of Ganges river dolphins ( <i>Platanista gangetica gangetica</i> ) in waterways of the Sundarbans mangrove forest, Bangladesh                                                   | Aquatic Mammals                                                                                | 34  |
| 132 | Marigo, J., and B. de B. Giffoni                                                                                                          | 2010 | Sightings and bycatch of small pelagic cetaceans, new information registered by volunteer fishermen off Sao Paulo, Brazil                                                                                                   | Brazilian Journal of Oceanography                                                              | 58  |
| 133 | Marine Connection                                                                                                                         | 2007 | The South West Dolphin Report                                                                                                                                                                                               | A joint publication by the Marine Connection & The Wildlife Trusts.                            |     |
| 134 | McVea, T.A. and S.J. Kennelly, eds.                                                                                                       | 2005 | Proceedings of the 4th International Fisheries Observer Conference. Sydney, Australia; 8-11 November 2004.                                                                                                                  | ACCOBAMS. International workshop on bycatch within the                                         |     |
| 135 | Mihaylov, K.                                                                                                                              | 2008 | Overview on the current status of cetacean-fisheries conflicts including bycatch and depredation with a critical review of historical data                                                                                  | ACCOBAMS area                                                                                  |     |
| 136 | A. Miraggiuolo, B. Mussi and G. Bearzi                                                                                                    | 2002 | Observation of Driftnetting Off the Island of Ischia, Italy with Indirect Evidence of Dolphin Bycatch.                                                                                                                      |                                                                                                |     |
| 137 | Morizur                                                                                                                                   | 1996 | Bycatch and discarding in Pelagic trawl                                                                                                                                                                                     |                                                                                                |     |

|     |                                                                                                                       |      |                                                                                                                                                                                                                                                                                             |                                                                                                                          |     |
|-----|-----------------------------------------------------------------------------------------------------------------------|------|---------------------------------------------------------------------------------------------------------------------------------------------------------------------------------------------------------------------------------------------------------------------------------------------|--------------------------------------------------------------------------------------------------------------------------|-----|
| 138 | Morizur, Y., S.D. Berrow, N.J.C. Tregenza, A.S. Couperus, and S. Pouvreau                                             | 1999 | Incidental catches of marine mammals in pelagic trawl fisheries of the northeast Atlantic.                                                                                                                                                                                                  | Fisheries Research International Whaling Commission Scientific Committee - Report SC/51/SM42                             | 41  |
| 139 | Northridge, S.P. and P.S. Hammond                                                                                     | 1999 | Estimation of porpoise mortality in UK gill and tangle net fisheries in the North Sea and west of Scotland. Monitoring levels required in European Fisheries to assess cetacean bycatch, with particular reference to UK fisheries                                                          | Final Report to DEFRA (EWD) - August 2003<br>Contract Report to DEFRA on the Work Conducted 2005-2006                    |     |
| 140 | Northridge, S. and L. Thomas                                                                                          | 2003 |                                                                                                                                                                                                                                                                                             |                                                                                                                          |     |
| 141 | Northridge, S., A. Kingston, L. Thomas, and A. Mackay                                                                 | 2007 | Second Annual Report on the UK Cetacean Bycatch Monitoring Scheme                                                                                                                                                                                                                           |                                                                                                                          |     |
| 142 | Northridge, S., and A. Kingston                                                                                       | 2009 | Common dolphin bycatch in UK fisheries                                                                                                                                                                                                                                                      | International Whaling Commission Scientific Committee SC/61/SM37. June 2009 Madeira, Portugal                            |     |
| 143 | O'Brien, J.W., and J.S. Sunada                                                                                        | 1994 | A review of the southern California experimental drift longline fishery for sharks, 1988-1991                                                                                                                                                                                               | CalCOFI Report                                                                                                           | 35  |
| 144 | B. Ozturk, A. A. Ozturk and A. Dede Bayram Ozturk, Ayaka Amaha                                                        | 1999 | Cetacean bycatch in the western coast of the Turkish Black Sea in 1993-1997                                                                                                                                                                                                                 | Annual Conference of the European Cetacean Society                                                                       |     |
| 145 | Ozturk and Ayhan Dede                                                                                                 | 2001 | Dolphin Bycatch in the Swordfish Fishery in the Aegean Sea<br>Compilation of marine mammal incidental take data from the domestic and joint venture groundfish fisheries in the U.S. EEZ of the North Pacific, 1989-2001                                                                    | Rapp. Cotton, Int. Mer Medit                                                                                             |     |
| 146 | Perez, M.A.                                                                                                           | 2003 |                                                                                                                                                                                                                                                                                             | NOAA Tech Memo NMFS-AFSC-138                                                                                             |     |
| 147 | Perez J.A.A, Wahrlich R.                                                                                              | 2005 | A bycatch of the gillnet monkfish <i>Lophius gastrophysus</i> fishery off southern Brazil<br>Analysis of marine mammal bycatch data from the trawl, longline, and pot groundfish fisheries of Alaska, 1998-2004, defined by geographic area, gear type, and catch target groundfish species | Fisheries Research                                                                                                       | 72  |
| 148 | Perez, M.A.                                                                                                           | 2006 |                                                                                                                                                                                                                                                                                             | NOAA Tech Memo NMFS-AFSC-167                                                                                             |     |
| 149 | Petersen, X. and Z. McDonell                                                                                          | 2007 | A Bycatch Assessment of the Cape horse Mackerel Mid-water trawl fishery off South Africa<br>Harbour porpoises ( <i>Phocoena phocoena</i> ) in the North Sea: numerical responses to changes in environmental conditions                                                                     | WWF Birdlife South Africa                                                                                                |     |
| 150 | Reijnders, P.J.H.                                                                                                     | 1992 | Estimated Takes of Protected Species in the Commercial Directed Shark Bottom Longline Fisher 2003,2004 and 2005                                                                                                                                                                             | Netherlands Journal of Aquatic Ecology                                                                                   | 26  |
| 151 | Richards, P.M.                                                                                                        | 2007 |                                                                                                                                                                                                                                                                                             | National Marine Fisheries Service                                                                                        |     |
| 152 | Robertson, B.C., and B.L. Chilvers                                                                                    | 2011 | The population decline of the New Zealand sea lion <i>Phocarctos hookeri</i> : a review of possible causes                                                                                                                                                                                  | Mammal Review<br>Report of the International Whaling Commission - Report #46.                                            | 41  |
| 153 | Rogan, E. and S.D. Berrow                                                                                             | 1996 | A Review of Harbour Porpoises, <i>Phocoena phocoena</i> , in Irish Waters.                                                                                                                                                                                                                  |                                                                                                                          |     |
| 154 | Rogan, E. and M. Mackey                                                                                               | 2007 | Megafauna bycatch in drift nets for albacore tuna in the NE Atlantic                                                                                                                                                                                                                        | Fisheries Research                                                                                                       | 86  |
| 155 | Romanov, E.V.                                                                                                         | 2001 | Bycatch in the tuna purse-seine fisheries of the western Indian Ocean                                                                                                                                                                                                                       | Fishery Bulletin                                                                                                         | 100 |
| 156 | Evgeny V. Romanov                                                                                                     | 2002 | Bycatch in the tuna purse-seine fisheries of the western Indian Ocean                                                                                                                                                                                                                       | Fishery Bulletin                                                                                                         | 100 |
| 157 | Rosas, F.C.W., E.L.A. Monteiro-Filho, and M.R. de Oliveira                                                            | 2002 | Incidental catches of Franciscana ( <i>Pontoporia blainvillei</i> ) on the southern coast of Sao Paulo state and the coast of Parana state, Brazil                                                                                                                                          | LAJAM<br>Working paper presented to the 10th Advisory Committee meeting of ASCOBANS Bonn, Germany, April 2003.           | 1   |
| 158 | Ross, A.                                                                                                              | 2003 | Cetacean bycatch in pelagic trawl fisheries in the Celtic Sea, Biscay, Channel area - a case for emergency action.                                                                                                                                                                          | Document AC10/Doc. 19.                                                                                                   |     |
| 159 | Ross, A. and S. Isaac                                                                                                 | 2004 | The Net Effect? A review of cetacean bycatch in pelagic trawls and other fisheries in the north-east Atlantic. Incidental catches of franciscana in coastal gillnet fisheries in the Franciscana Management Area III: period 1999-2000                                                      | WDCS Report for Greenpeace.<br>IWC Scientific Working Paper SC/56/SM17                                                   |     |
| 160 | Secchi, E., Kinas, P., Muelbert, M. Siebert, U., A. Gilles, K. Lucke, M. Ludwig, H. Benke, K.H. Kock, and M. Scheidat | 2004 |                                                                                                                                                                                                                                                                                             |                                                                                                                          |     |
| 161 | Silva, M.A., R. Feio, R. Prieto, J.M. Goncalves, and R.S. Santos                                                      | 2006 | A decade of harbour porpoise occurrence in German waters - analyses of aerial surveys, incidental sightings and strandings.                                                                                                                                                                 | Journal of Sea Research                                                                                                  | 56  |
| 162 | Silva, M.A., R. Feio, R. Prieto, J.M. Goncalves, and R.S. Santos                                                      | 2002 | Interactions between cetaceans and the tuna fishery in the Azores<br>Patterns in the mortality of common dolphins ( <i>Delphinus delphis</i> ) on the Portugese coast, using stranding records, 1975-1998                                                                                   | Marine Mammal Science                                                                                                    | 18  |
| 163 | Silva, M.A. and M. Sequeira                                                                                           | 2003 |                                                                                                                                                                                                                                                                                             | Aquatic Mammals                                                                                                          | 29  |
| 164 | Silvani, L., M. Gazo, and A. Aguilar Sjare, B., D. Walsh, G.B. Stenson, and S. Benjamins                              | 1999 | Spanish driftnet fishing and incidental catches in the western Mediterranean                                                                                                                                                                                                                | Biological Conservation<br>Fisheries and Oceans Canada, Canadian Science Advisory Secretariat Research Document 2005-049 | 90  |
| 165 | Spencer, N., Santos-Vazquez, M.B., and G.J. Pierce                                                                    | 2005 | An update on harp seal ( <i>Pagophilus groenlandicus</i> ) by-catch estimates in the Newfoundland lumpfish fishery                                                                                                                                                                          | European Commission - Report #XIV/1999/01 Lot 7(31/12/99 - 31/10/00)                                                     |     |
| 166 |                                                                                                                       | 2001 | Evaluation of the state of knowledge concerning by-catches of cetaceans.                                                                                                                                                                                                                    |                                                                                                                          |     |

|     |                                                                                                                                              |      |                                                                                                                                                                                                                                                    |                                                                                                                     |      |
|-----|----------------------------------------------------------------------------------------------------------------------------------------------|------|----------------------------------------------------------------------------------------------------------------------------------------------------------------------------------------------------------------------------------------------------|---------------------------------------------------------------------------------------------------------------------|------|
| 167 | Sumpton, W.D., S.M. Taylor, N.A. Gribble, G. McPherson, and T. Ham                                                                           | 2011 | Gear selectivity of large-mesh nets and drumlines used to catch sharks in the Queensland Shark Control Program                                                                                                                                     | African Journal of Marine Science                                                                                   | 33   |
| 168 | Swarbrick                                                                                                                                    | 1994 | Investigation of selectivity of static                                                                                                                                                                                                             | Royal Commission on Environmental Pollution                                                                         |      |
| 169 | Arda M. Tonay and Bayram Ozturk                                                                                                              | 2003 | Cetacean bycatches in the Turbot fishery on the western coast of the Turkish Black Sea.                                                                                                                                                            | International Symposium of Fisheries and Zoology                                                                    |      |
| 170 | Arda M. Tonay, Ayhan Dede and Ayaka A. Ozturk                                                                                                | 2007 | Stomach contents of bycaught Harbour Porpoises ( <i>Phocoena phocoena</i> ) from the Marmara Sea                                                                                                                                                   | Rapp. Comm. Int. Mer Medit                                                                                          | 38   |
| 171 | Tregenza, N.J.C., S.D. Berrow, P.S. Hammond, and R. Leaper                                                                                   | 1997 | Harbour porpoise ( <i>Phocoena phocoena</i> L.) by-catch in set gillnets in the Celtic Sea.                                                                                                                                                        | ICES Journal of Marine Science                                                                                      | 54   |
| 172 | Tregenza, N.J.C., S.D. Berrow, P.S. Hammond, and R. Leaper                                                                                   | 1997 | Common dolphin, <i>Delphinus delphis</i> L., bycatch in bottom set gillnets in the Celtic Sea                                                                                                                                                      | Report of the International Whaling Commission<br>Report of the International Whaling Commission #48.               | 47   |
| 173 | Tregenza, N.J.C. and A. Collet                                                                                                               | 1998 | Common Dolphin ( <i>Delphinus delphis</i> ) Bycatch in Pelagic Trawl and Other Fisheries in the Northeast Atlantic                                                                                                                                 | SC/49/NA9                                                                                                           |      |
| 174 | Trippel, E.A., J.Y. Wang, M.B. Strong, L.S. Carter, and J.D. Conway                                                                          | 1996 | Incidental mortality of harbour porpoise ( <i>Phocoena phocoena</i> ) by the gill net fishery in the lower Bay of Fundy                                                                                                                            | Can. J. Fish. Aquat. Sci.                                                                                           | 53   |
| 175 | Trippel, E.A., M.B. Strong, J.M. Terhune, and J.D. Conway                                                                                    | 1999 | Mitigation of harbour porpoise ( <i>Phocoena phocoena</i> ) by-catch in the gillnet fishery in the lower Bay of Fundy                                                                                                                              | Canadaian Journal of Fisheries and Aquatic Sciences<br>Canadian Technical Report for Fisheries and Aquatic Sciences | 56   |
| 176 | Trippel, E.A., and T.D. Shepherd                                                                                                             | 2004 | By-catch of harbour porpoise ( <i>Phocoena phocoena</i> ) in the lower Bay of Fundy gillnet fishery, 1998-2001                                                                                                                                     |                                                                                                                     | 2521 |
| 177 | Sergi Tudela and Paolo Guglielmi                                                                                                             | 2003 | Biodiversity impact of the Moroccan driftnet fleet operating in the Alboran Sea (SW Mediterranean)<br>Ecosystem effects of fishing in the Mediterranean: An analysis of the major threats of fishing gear and practices to biodiversity and marine | WWF                                                                                                                 |      |
| 178 | Tudela, Sergi                                                                                                                                | 2004 | MEDITERRANEAN: AN ANALYSIS OF THE MAJOR THREATS OF FISHING GEAR AND PRACTICES TO BIODIVERSITY AND MARINE HABITS                                                                                                                                    | FAO<br>Report of the International Whaling Commission. Special Issue                                                | 15   |
| 179 | Van Waerebeek, K., and J.C. Reyes                                                                                                            | 1994 | A note on the incidental fishery mortality of southern Minke whales off western South America                                                                                                                                                      |                                                                                                                     |      |
| 180 | Van Waerebeek, K., M.-F. Van Bresseem, F. Felix, J. Algaro-Shigueto, A. Garcia-Godos, L. Chavez-Lisambart, K. Onton, D. Montes, and R. Bello | 1997 | Mortality of dolphins and porpoises in coastal fisheries off Peru and southern Ecuador in 1994                                                                                                                                                     | Biological Conservation                                                                                             | 81   |
| 181 | Vidal, O.                                                                                                                                    |      |                                                                                                                                                                                                                                                    |                                                                                                                     |      |
| 181 | Van Waerebeek, K.                                                                                                                            |      |                                                                                                                                                                                                                                                    |                                                                                                                     |      |
| 181 | Findley, L. T.                                                                                                                               | 1994 | Cetaceans and gillnet fisheries in Mexico, Central America and the wider Caribbean: a preliminary review                                                                                                                                           | Report of the International Whaling Commission                                                                      |      |
| 182 | Vinther, M.                                                                                                                                  | 1999 | Bycatches of harbour porpoises ( <i>Phocoena phocoena</i> L.) in Danish set-net fisheries                                                                                                                                                          | Journal of Cetacean Research and Management                                                                         | 1    |
| 183 | Vinther, M. and F. Larsen                                                                                                                    | 2004 | Updated estimates of harbour porpoise ( <i>Phocoena phocoena</i> ) bycatch in the Danish North Sea bottom-set gillnet fishery                                                                                                                      | Journal of Cetacean Research Management                                                                             | 6    |
| 184 | Wade, P. R. Watters, G. M. Gerrodette, T. Reilly, S. B.                                                                                      | 2007 | Depletion of spotted and spinner dolphins in the eastern tropical Pacific: modeling hypotheses for their lack of recovery                                                                                                                          | Marine Ecology-Progress Series                                                                                      | 343  |
| 185 | Waring, G.T., E. Josephson, K. Maze-Foley, and P.E. Rosel                                                                                    | 2010 | U.S. Atlantic and Gulf of Mexico marine mammal stock assessments - 2010                                                                                                                                                                            | NOAA Tech Memo NMFS-NE-219                                                                                          |      |
| 186 | West, I.F., J. Molloy, M.F. Donoghue, and C. Pugsley                                                                                         | 1999 | Seabird and Marine Mammal Bycatch Reduction Through Fishing Industry Funded Research: The New Zealand Conservation Services Levy Program                                                                                                           | Marine Technology Society Journal                                                                                   | 33   |
| 187 | Wienecke, Barbara                                                                                                                            | 2002 | Seabird and seal -- fisheries interactions in the Australian Patagonian toothfish <i>Dissostichus eleginoides</i> trawl fishery                                                                                                                    | Fisheries Research                                                                                                  | 54   |
| 187 | Robertson, Graham                                                                                                                            |      |                                                                                                                                                                                                                                                    |                                                                                                                     |      |
| 188 | Yeung, C.                                                                                                                                    | 1999 | Estimates of marine mammal and marine turtle bycatch by the U.S. Atlantic pelagic longline fleet in 1998.                                                                                                                                          | NOAA Tech Memo NMFS-SEFSC-430                                                                                       |      |
| 189 | Yeung, C.                                                                                                                                    | 2011 | Estimates of marine mammal and marine turtle bycatch by the U.S. Atlantic pelagic longline fleet in 1999-2000                                                                                                                                      | NOAA Tech Memo NMFS-SEFSC-467                                                                                       |      |

|     |                                                                                                                                          |      |                                                                                               |                                               |    |
|-----|------------------------------------------------------------------------------------------------------------------------------------------|------|-----------------------------------------------------------------------------------------------|-----------------------------------------------|----|
|     | K.S.S.M. Yousouf, A.K. Anoop, B. Anoop, V.V. Afsal, E. Vivenkanandan, R.P. Kumarran, M. Rajagopalan, P.K. Krishnakumar and P. Jayasankar | 2008 | Observations on incidental catch of cetaceans in three landing centres along the Indian coast | JMBA2- Biodiversity Records                   |    |
| 190 | Alfredo Zavala-Gonzales, Jorge Urban-Ramirez and Carlos Esquivel-                                                                        |      |                                                                                               |                                               |    |
| 191 | Macias Zeeberg, J., A. Corten, and E. de Graaf                                                                                           | 1994 | A note on artisanal fisheries interactions with small cetaceans in Mexico.                    | Rep. Int. Whal. Commn.                        |    |
| 192 | Zerbini, A.N., and J.E. Kotas                                                                                                            | 2006 | Bycatch and release of pelagic megafauna in industrial trawler fisheries of Northwest Africa  | Fisheries Research                            | 78 |
| 193 |                                                                                                                                          | 1998 | A note on cetacean bycatch in pelagic driftnetting off southern Brazil                        | Report of the International Whaling Committee | 48 |

#### Sea turtles

|    | authors                                                                                                                                             | year | title                                                                                                                                                                                                                                     | journal                                                                                                                                                                                                                                   | volume |
|----|-----------------------------------------------------------------------------------------------------------------------------------------------------|------|-------------------------------------------------------------------------------------------------------------------------------------------------------------------------------------------------------------------------------------------|-------------------------------------------------------------------------------------------------------------------------------------------------------------------------------------------------------------------------------------------|--------|
| 1  | Abdulqader, Ebrahim A.A.                                                                                                                            | 2010 | Turtle captures in shrimp trawl nets in Bahrain                                                                                                                                                                                           | Aquatic Ecosystem Health & Management<br>En: Arena, G. & M. Rey (eds): Captura de grandes peces pelagicos (pez espada y atunes) en el Atlantico Sudoccidental, y su interaccion con otras poblaciones.                                    | 13     |
| 2  | Achaval, F., Y.H. Marin, & L.C. Barea                                                                                                               | 2000 | Captura incidental de tortugas con palangre pelagico oceanico en el atlantico sudoccidental<br>Impact of Spanish swordfish longline fisheries on the loggerhead sea turtle <i>Caretta caretta</i> population in the Western Mediterranean | INAPE-Uruguay                                                                                                                                                                                                                             |        |
| 3  | Aguilar, R., Mas, J., Pastor, X.                                                                                                                    | 1995 |                                                                                                                                                                                                                                           | 4ta Reunión de Investigación y Conservación de Tortugas Marinas en el Atlántico Sur Occidental (ASO) y III Jornadas de Conservación e Investigación de Tortugas Marinas en el Atlántico Sur Occidental (ASO), 25 al 28 de octubre de 2007 |        |
| 4  | Albareda, D., P. Bordino, L. Prosdocimi, S. Rodriguez-Heredia, M.F. Zapata, V. Gonzalez-Carman                                                      | 2007 | Green sea turtle ( <i>Chelonia mydas</i> ) by-catch in the artisanal gillnet fishery of southern Samborombón Bay, Buenos Aires, Argentina                                                                                                 | 28th Annual Symposium on Sea Turtle Biology and Conservation. Book of Abstracts. Dean, K. and Lopez, M. eds.                                                                                                                              |        |
| 5  | Albareda, D., Prosdocimi, L., Alvarez, K., Di Paola, J. L., Massola, V., Gonzalez-Carman, V., Dellacasa, R., Gonzalez, R., Bordino, P., & Uhart, M. | 2008 | Sea turtle conservation problems in Argentina: By-catch and marine debris ingestion                                                                                                                                                       | Proceedings from the 24th Annual Symposium on Sea Turtle Conservation and Biology, San Jose, Costa Rica                                                                                                                                   |        |
| 6  | Alfaro-Shigueto, J., Dutton, P., Vega, D., Mangel, J.C., Santillan, L., de Paz, N.                                                                  | 2004 | Records of leatherback turtle bycatch from Peru                                                                                                                                                                                           | Proceedings of the Twenty-fourth Annual Symposium on Sea Turtle Biology and Conservation. NOAA Technical Memorandum NMFS-SEFSC-567 (eds R. B. Mast, B. J. Hutchinson & A. H. Hutchinson).                                                 |        |
| 7  | Alfaro-Shigueto, J., Dutton, P., Vega, D., Mangel, J.C., Santillan, L., de Paz, N.                                                                  | 2007 | RECORDS OF LEATHERBACK TURTLE BYCATCH FROM PERU                                                                                                                                                                                           |                                                                                                                                                                                                                                           |        |
| 8  | Joanna Alfaro Shigueto, Jeffrey C. Mangel and Koen Van Waerebeek                                                                                    | 2008 | Small cetacean captures and CPUE estimates in artisanal fisheries operating from a port in Peru, 2005-2007                                                                                                                                | IWC Scientific Committee Meeting Santiago, June 2008                                                                                                                                                                                      |        |
| 9  | Alfaro-Shigueto, Joanna, Jeffrey C. Mangel, Francisco Bernedo, Peter H. Dutton, Jeffrey A. Seminoff, and Brendan J. Godley                          | 2011 | Small-scale fisheries of Peru: a major sink for marine turtles in the Pacific<br>Incidental capture and mortality of sea turtles in the industrial shrimp trawling fishery of northeastern Venezuela                                      | Journal of Applied Ecology                                                                                                                                                                                                                |        |
| 10 | Alio, JJ, LA Marciano, DE Altuve                                                                                                                    | 2010 |                                                                                                                                                                                                                                           | Ciencias Marinas                                                                                                                                                                                                                          | 36     |
| 11 | Alvarez de Quevedo, Irene                                                                                                                           | 2004 | Bottom trawling is a Threat for the Conservation of Loggerhead Sea Turtles off North-eastern Spain                                                                                                                                        | Book of Abstracts                                                                                                                                                                                                                         |        |
| 12 | Amande, M.J., J. Ariz, E. Chassot, A. Delgado de Molina, D. Gaertner, H. Murua, R. Pianet, J. Ruiz and P. Chvance                                   | 2010 | Bycatch of the European purse seine tuna fishery in the Atlantic Ocean for the 2003-2007 period                                                                                                                                           | Aquatic Living Resources                                                                                                                                                                                                                  | 23     |
| 13 | Ambrose, E.E., B.B. Solarin, C.E. Isebor, and A.B. Williams                                                                                         | 2005 | Assessment of fish by-catch species from coastal artisanal shrimp beam trawl fisheries in Nigeria                                                                                                                                         | Fisheries Research                                                                                                                                                                                                                        | 71     |

|    |                                                                                                        |      |                                                                                                                                                                                   |                                                                                                                                                                                                     |     |
|----|--------------------------------------------------------------------------------------------------------|------|-----------------------------------------------------------------------------------------------------------------------------------------------------------------------------------|-----------------------------------------------------------------------------------------------------------------------------------------------------------------------------------------------------|-----|
| 14 | Arauz, Randall                                                                                         | 1996 | A description of the Central America shrimp fisheries with estimates of incidental capture and mortality of sea turtles                                                           | J. A. Keinath, D. E. Barnard, J. A. Musick, and B. A. Bell, editors. Proceedings of the Fifteenth Annual Workshop on Sea Turtle Biology and Conservation. NOAA Technical Memorandum NMFS-SEFSC-387. |     |
| 15 | Arauz, R., R. Vargas, I. Naranjo, and C. Gamboa                                                        | 1998 | Analysis of the incidental capture and mortality of sea turtles in the shrimp fleet of Pacific Costa Rica.                                                                        | S. P. Epperly and J. Braun, editors. Proceedings of the Seventeenth Annual Sea Turtle Symposium. U.S. Dep. Commer. NOAA Tech. Memo. NMFS-SEFSC-415                                                  |     |
| 16 | Arauz, R.                                                                                              | 1999 | Description of the Eastern Pacific High-Seas Longline and Coastal Gillnet Swordfish Fisheries of South America, including sea turtle interaction, and management recommendations. |                                                                                                                                                                                                     |     |
| 17 | Arauz, R., Rodriguez, O., Vargas, R., Segura, A.                                                       | 2000 | Incidental capture of sea turtles by Costa Rica's longline fleet                                                                                                                  | Proceedings from the 19th Annual Symposium on Sea Turtle Biology and Conservation, South Padre Island, TX, USA                                                                                      |     |
| 18 | Arauz, R.                                                                                              | 2000 | EQUITABLE FISHERIES AND CONSERVATION OF MARINE RESOURCES: AN EVALUATION OF PUBLIC LAW, Central American Report                                                                    |                                                                                                                                                                                                     |     |
| 19 | Arauz, R.                                                                                              | 2004 | Incidental capture of sea turtles by High seas longline pelagic fisheries in Costa Rica's Exclusive Economic Zone (EEZ) - A second look                                           | Proceedings from the 21st Annual Symposium on Sea Turtle Biology and Conservation, Philadelphia, USA                                                                                                |     |
| 20 | Azevedo, Venâncio Guedes de Matsuura, Yasunobu Matsuura                                                | 2002 | Caracterização das capturas ocorridas em um cruzeiro de pesca na frota espinheira comercial                                                                                       |                                                                                                                                                                                                     |     |
| 21 | Baez, J., Real, R., Caminas, J.                                                                        | 2007 | Differential distribution within longline transects of loggerhead turtles and swordfish captured by the Spanish Mediterranean surface longline fishery                            | J. Mar. Biol. Ass. U.K.                                                                                                                                                                             | 87  |
| 22 | Baez, J., R. Real, J. Caminas                                                                          | 2007 | Differential distribution within longline transects of loggerhead turtles and swordfish captured by the Spanish Mediterranean surface longline fishery                            |                                                                                                                                                                                                     |     |
| 23 | Jose C. Baez, Ramundo Real, Carlos Garcia-Soto, Jose M. de la Serna, David Marcias and Juan A. Caminas | 2007 | Loggerehead turtle by-catch depends on distance to the coast, independent of fishing effort: implications for conservation and management                                         | Marine Ecology Progress Series                                                                                                                                                                      | 338 |
| 24 | Bahia, Natalia Cristina Fidelis, Ana Cristina Vigliar Bondioli                                         | 2010 | Interacao das tartarugas marinhas com a pesca artesanal de cerco-fixo em Cananeia, litoral sul de Sao Paulo                                                                       | Biotemas                                                                                                                                                                                            | 23  |
| 25 | Bailey, K., P.G. Williams, and D. Itano                                                                | 1996 | By-catch and discards in western Pacific tuna fisheries: A review of SPC data holdings and literature.                                                                            | South Pacific Commission, Oceanic Fisheries Programme. Technical Report No. 34                                                                                                                      |     |
| 26 | Balazs, G.H. and S.G. Pooley                                                                           | 1994 | Research Plan to Assess Marine Turtle Hooking Mortality: Results of an Expert Workshop Held in Honolulu, Hawaii November 16-18, 1993                                              | NOAA/NMFS Technical Memorandum                                                                                                                                                                      |     |
| 27 | Balazs, G., Pooley, S., Marukawa, S.                                                                   | 1995 | Guidelines for handling marine turtles hooked or entangled in the Hawaii longline fishery: results of an expert workshop held in Honolulu, Hawaii March 15-17, 1995               |                                                                                                                                                                                                     |     |
| 28 | Banaru, D., I. Dekeyser, G. Imbert, and L. Laubier                                                     | 2010 | Non-target and released alive by-catch distributions observed during French driftnet fishery in the northwestern Mediterranean Sea (2000-2003 database)                           | Journal of Oceanography, Research and Data                                                                                                                                                          | 3   |
| 29 | Barata, P.C.R., Gallo, B.M.G., Dos Santos, S., Azevedo, V.G., Kotas, J.E.                              | 1998 | Captura acidental da tartaruga marinha Caretta caretta na pesca de espinhel de superficie na zee Brasileira e em aguas internacionais                                             | Resumos expandidos, XI Semana Nacional de Oceanografia, Rio Grande, RS, Brazil                                                                                                                      |     |
| 30 | Barata, P., Lima, E., Borges-Martins, M., Scalfoni, J., Bellini, C., Siciliano, S.                     | 2004 | Records of the leatherback sea turtle (Dermochelys coriacea) on the Brazilian coast 1969-2001                                                                                     | J. Mar. Bio. Ass. U.K.                                                                                                                                                                              | 84  |
| 31 | I.E. Baremore, J.K. Carlson, L.D. Hollensead, D.M. Bethea                                              | 2007 | Catch and Bycatch in U.S. Southeast Gillnet Fisheries, 2007.                                                                                                                      | NMFS Southeast Fishery Science Center Technical Memorandum                                                                                                                                          |     |
| 32 | Beerkircher, L. Brown, C., Abercrombie, D., Lee, D.                                                    | 2005 | Overview of the SEFSC pelagic observer program in the northwest atlantic from 1992-2002                                                                                           | Col. Vol. Sci. Pap. ICCAT                                                                                                                                                                           | 58  |
| 33 | Beverly, S.                                                                                            | 2004 | New deep setting longline techniquw for bycatch mitigation                                                                                                                        | Secretariat of the Pacific Community                                                                                                                                                                |     |
| 34 | Beverly, S. and L. Chapman                                                                             | 2007 | Interactions Between Sea Turtles and Pelagic Longline Fisheries.                                                                                                                  | Western and Central Pacific Fisheries Commission - Scientific Committee Third Regular Session. 13-24 August 2007, Hawaii, USA.                                                                      |     |
| 35 | Boggs, C.H. and Y. Swimmer                                                                             | 2007 | Developments (2006-2007) in scientific research on the use of modified fishing gear to reduce longline bycatch of sea turtles.                                                    | Western and Central Pacific Fisheries Commission Scientific Committee Third Regular Session.                                                                                                        |     |
| 36 | Eds.: Bolten, A.B., H.R. Martins, and K. A. Bjorndal.                                                  | 1998 | Workshop to design an experiment to determine the effects of longline gear modification on sea turtle bycatch rates; 2-4 September 1998, Horta, Azores, Portugal                  |                                                                                                                                                                                                     |     |
| 37 | Bolten, Alan, et al                                                                                    | 2002 | Preliminary results of experiments to evaluate effects of hook type on sea turtle bycatch in the swordfish longline fishery in the Azores                                         | Azores project summary                                                                                                                                                                              |     |



|    |                                                                                                                             |      |                                                                                                                                                                                                                                                                              |                                                                                                                      |     |
|----|-----------------------------------------------------------------------------------------------------------------------------|------|------------------------------------------------------------------------------------------------------------------------------------------------------------------------------------------------------------------------------------------------------------------------------|----------------------------------------------------------------------------------------------------------------------|-----|
| 38 | Bolten, A.B. and K. A. Bjorndal                                                                                             | 2003 | Experiment to evaluate gear modification on rates of sea turtle bycatch in the swordfish longline fishery in the Azores - Phase 2.                                                                                                                                           | Final Project Report - NOAA Award #NA16FM1378                                                                        |     |
| 39 | Bolten A.B. and K.A. Bjorndal                                                                                               | 2004 | Experiment to evaluate gear modification on rates of sea turtle bycatch in the swordfish longline fishery in the Azores - Phase 3                                                                                                                                            | Final Project Report - NOAA Award #NA16FM2589                                                                        |     |
| 40 | John C. Brazner and James McMillan                                                                                          | 2008 | Loggerhead turtle ( <i>Caretta caretta</i> ) bycatch in Canadian pelagic longline fisheries: Relative importance in the western North Atlantic and opportunities for mitigation                                                                                              | Fisheries Research                                                                                                   | 91  |
| 41 | Brewer, David, et al                                                                                                        | 2006 | The impact of turtle excluder devices and bycatch reduction devices on diverse tropical marine communities in Australia's northern prawn trawl fishery                                                                                                                       | Fisheries Research<br>Proceedings of the Western Pacific Sea Turtle Cooperative Research and Management Workshop     | 81  |
| 42 | Brogan, D.<br>Bugoni, L, TS Neves, NO Leite JR, D<br>Carvalho, G Sales, RW Furness, CE<br>Stein, FV Peppes, BB Giffoni, DS  | 2002 | A review of turtle by-catch in the Western and Central Pacific Ocean tuna fisheries                                                                                                                                                                                          |                                                                                                                      |     |
| 43 | Monteiro                                                                                                                    | 2008 | Potential bycatch of seabirds and turtles in hook-and-line fisheries of the Itaipava fleet, Brazil                                                                                                                                                                           | Fisheries Research 90 (2008) 217-224                                                                                 |     |
| 44 | Burgess, Emma, Mark Dimech,<br>Raymond Caruana, Michael<br>Darmanin, Helen Raine, Alan<br>Harrison, and Patrick J. Schembri | 2010 | Non-target by-catch in the maltese bluefin tuna ( <i>thunnus thynnus</i> ) longline fishery (central Mediterranean)<br>Tendencias espacio-temporales en las capturas accidentales to tortuga bobo ( <i>Caretta caretta</i> ) en la costa catalana entre los anos 2000 y 2009 | Collect. Vol. Sci. Pap. ICCAT                                                                                        | 65  |
| 45 | Buron, P. Garcia                                                                                                            | 2010 |                                                                                                                                                                                                                                                                              | Anales Universitarios de Etologia                                                                                    | 4   |
| 46 | Caminas                                                                                                                     | 1997 |                                                                                                                                                                                                                                                                              |                                                                                                                      |     |
| 47 | Caminas, J.A., Valeiras, J., de la<br>Serna, J.M.                                                                           | 2001 | Spanish surface longline gear types and effects on marine turtles in the western Mediterranean Sea<br>Sea turtles of the Mediterranean Sea: population dynamics, sources of mortality and relative importance of fisheries impacts                                           | The 1st Mediterranean Conference on Marine Turtles                                                                   |     |
| 48 | Caminas, Juan A.                                                                                                            | 2004 |                                                                                                                                                                                                                                                                              |                                                                                                                      |     |
| 49 | Juan A. Caminas, Jose C. Baez, Xulio<br>Valeiras and Raimundo Real                                                          | 2006 | Differential loggerhead by-catch and direct mortality due to surface longlines according to boat strata and gear type                                                                                                                                                        | Scientia Marina                                                                                                      | 70  |
| 50 | John K. Carlson                                                                                                             | 2001 | The Directed Shark Gillnet Fishery: Right Whale Season, 2001                                                                                                                                                                                                                 | Nation Marine Fisheries Service                                                                                      |     |
| 51 | John K. Carlson and Ivy E. Baremore<br>J.K. Carlson, D.M. Bethea, I.E.                                                      | 2003 | The Directed Shark Gillnet Fishery: Catch and Bycatch, 2003                                                                                                                                                                                                                  | National Marine Fisheries Service                                                                                    |     |
| 52 | Baremore                                                                                                                    | 2005 | The directed shark gillnet fishery: catch and bycatch, 2004                                                                                                                                                                                                                  | NMFS Southeast Fisheries Science Center, 05-01                                                                       |     |
| 53 | John K. Carlson and Donna M.<br>Bethea                                                                                      | 2007 | Catch and Bycatch in the Shark Gillnet Fishery: 2005-2006                                                                                                                                                                                                                    | National Marine Fisheries Service<br>Biological Conservation (submitted & reviewed by R. Lewison) UNPUBLISHED REPORT |     |
| 54 | Carranza, A., Domingo, A., &<br>Estrades, A.                                                                                | 2006 | Pelagic longline: a threat to sea turtles in the equatorial eastern Atlantic?                                                                                                                                                                                                |                                                                                                                      |     |
| 55 | Carlos Carreras, Luis Cardona and<br>Alex Aguilar                                                                           | 2004 | Incidental catch of the loggerhead turtle ( <i>Caretta caretta</i> ) off the Balearic Islands (western Mediterranean)                                                                                                                                                        | Biological Conservation<br>Southwest Fisheries Science Center Administrative Report, 02-12                           | 117 |
| 56 | J.V. Carretta                                                                                                               | 2002 | Preliminary Estimates of Cetacean Mortality in California Gillnet Fisheries for 2001                                                                                                                                                                                         |                                                                                                                      |     |
| 57 | J.V. Carretta, T. Price, D. Petersen<br>and R. Read                                                                         | 2004 | Estimates of Marine Mammal, Sea Turtle, and Seabird Mortality in the California Drift Gillnet Fishery for Swordfish and Thresher Shark, 1996-2002                                                                                                                            | Marine Fisheries Review<br>Southwest Fisheries Science Center Administrative Report, SC/56/SM1                       |     |
| 58 | J.V. Carretta and S.J. Chivers                                                                                              | 2004 | Preliminary Estimates of Marine Mammal Mortality and Biological Sampling of Cetaceans in California Gillnet Fisheries for 2003                                                                                                                                               | Southwest Fisheries Science Center Administrative Report, LJ-07-06                                                   |     |
| 59 | J.V. Carretta and L. Enriquez                                                                                               | 2007 | Marine mammal and sea turtle bycatch in the California/Oregon thresher shark and swordfish drift gillnet fishery in 2006                                                                                                                                                     |                                                                                                                      |     |
| 60 | Carretta, J.V., and J. Barlow<br>Carruthers, E.H., D.C. Schneider,<br>and J.D. Neilson                                      | 2011 | Long-term effectiveness, failure rates, and "dinner bell" properties of acoustic pingers in a gillnet fishery                                                                                                                                                                | Marine Technology Society Journal                                                                                    | 45  |
| 61 |                                                                                                                             | 2009 | Estimating the odds of survival and identifying mitigation opportunities for common bycatch in pelagic longline fisheries.                                                                                                                                                   | Biological Conservation                                                                                              | 142 |
| 62 | Casale, P., Laurent, L., & DeMetrio,<br>G.<br>Paolo Casale, Lorenzo Cattarino,<br>Daniella Freggi, Massimiliano and         | 2004 | Incidental capture of marine turtles by the Italian trawl fishery in the north Adriatic Sea                                                                                                                                                                                  | Biological Conservation                                                                                              | 119 |
| 63 | Roberto Argano                                                                                                              | 2007 | Incidental catch of marine turtles by Italian trawlers and longliners in the central Mediterranean                                                                                                                                                                           | Aquatic Conservation: Marine and Freshwater Ecosystems                                                               | 17  |
| 64 | Casale, P.                                                                                                                  | 2008 | Incidental catch of marine turtles in the Mediterranean Sea: captures, mortality, priorities.                                                                                                                                                                                | WWF Italy, Rome                                                                                                      |     |

|    |                                                                                                                  |      |                                                                                                                                                                                                                                                                                                           |                                                                                                                                                                                                                                                 |     |
|----|------------------------------------------------------------------------------------------------------------------|------|-----------------------------------------------------------------------------------------------------------------------------------------------------------------------------------------------------------------------------------------------------------------------------------------------------------|-------------------------------------------------------------------------------------------------------------------------------------------------------------------------------------------------------------------------------------------------|-----|
| 65 | Casale, P., Daniela Freggi and Massimiliano Rocco                                                                | 2008 | Mortality induced by drifting longline hook and branchlines in loggerhead sea turtles, estimated through observation in captivity                                                                                                                                                                         | Aquatic Conservation: Marine and Freshwater Ecosystems                                                                                                                                                                                          | 18  |
| 66 | Casale, P.                                                                                                       | 2008 | Incidental catch of marine turtles in the Mediterranean Sea: captures, mortality, priorities. WWF Italy, Rome.                                                                                                                                                                                            |                                                                                                                                                                                                                                                 |     |
| 67 | Cattarino, L. et al                                                                                              | 2006 | Turtle bycatch around Lampedusa Island, Central Mediterranean                                                                                                                                                                                                                                             | Book of Abstracts<br>2nd SPC Heads of Fisheries Meeting Working Paper #5.<br>Noumea, New Caledonia. Coastal Fisheries Programme,<br>Marine Resources Division, Secretariat of the Pacific<br>Community.                                         |     |
| 68 | Chapman, L.                                                                                                      | 2001 | Bycatch in the tuna longline fishery.                                                                                                                                                                                                                                                                     |                                                                                                                                                                                                                                                 |     |
| 69 | Cheng, I-J, and T-H Chen                                                                                         | 1997 | The incidental capture of five species of sea turtles by coastal setnet fisheries in the easter waters of Taiwan                                                                                                                                                                                          | Biological Conservation<br>International Workshop on the Migration, Foraging Habits<br>and Nesting Ecology of Marine Turtles in Taiwan. 12-14<br>April 1999 Taipei, Taiwan.                                                                     | 82  |
| 70 | Cheng, I.J., C.M. Chen, and T.P. Wei, eds.                                                                       | 2000 | Sea Turtle Conservation in Taiwan and the Using of Satellite Telemetry as a Tool to Reach the Goal of International and Regional Conservation Cooperation.                                                                                                                                                | Western Pacific Sea Turtle Cooperative Research and<br>Management Workshop                                                                                                                                                                      |     |
| 71 | Cheng                                                                                                            | 2002 | Current sea turtle research and conservation in Taiwan                                                                                                                                                                                                                                                    |                                                                                                                                                                                                                                                 |     |
| 72 | Chevalier, J.                                                                                                    | 2001 | Etude des captures accidentelles de tortues marines liées à la pêche au filet dérivant dans l'ouest guyanais.                                                                                                                                                                                             | Office National de la Chasse et de la Faune Sauvage, Paris.<br>Libro de Resumenes II Reunion sobre la investigacion y<br>conservacion de tortugas marinas del atlantico sur<br>occidental                                                       |     |
| 73 | Contato, Maria C.D., Jules M.R. Soto, Fabiano D. Rosa                                                            | 2004 | Captura incidental de tartaruga-de-couro Dermochelys coriacea e tartaruga-verde Chelonia mydas em redes-de-<br>emalhe-de-fundo no sul do Brasil                                                                                                                                                           | NOAA Technical Memorandum NMFS-OPR-7                                                                                                                                                                                                            |     |
| 74 | Coogan, CC                                                                                                       | 1996 | Section 7 of the Endangered Species Act and Pelagic Longline Fisheries                                                                                                                                                                                                                                    |                                                                                                                                                                                                                                                 |     |
| 75 | Dean, Kama and Lopez-Castro, Melania C., compilers                                                               | 2010 | Proceedings of the Twenty-eighth Annual Symposium on Sea Turtle Biology and Conservation, 2009                                                                                                                                                                                                            | NOAA Technical Memorandum NOAA NMFS-SEFSC-603                                                                                                                                                                                                   |     |
| 76 | Michele Deflorio, Aida Aprea, Aldo Correrio, Nicoletta Santamaria and Gregorio De Metrio                         | 2005 | Incidental captures of sea turtles by swordfish and albacore longlines in the Ionian sea<br>Estimation des captures accidentelles de tortues marines par les fileyeurs de la pêche côtière en Guyane.<br>AgroCampus Rennes.                                                                               | Fisheries Science                                                                                                                                                                                                                               | 71  |
| 77 | Delamare, A.                                                                                                     | 2005 |                                                                                                                                                                                                                                                                                                           |                                                                                                                                                                                                                                                 |     |
| 78 | de la Serna, Jose Miguel<br>Ortiz de Urbina, Jose Maria<br>Garcia Barcelona, Salvador                            | 2006 | Peces espada en peligro<br>Etude des captrues accidentelles de tortues marines par la peche maritime dans les eaux de l'archipel<br>Guadeloupeen. AEVA.                                                                                                                                                   | Revista Electronica del Instituto Espanol de Oceanografia                                                                                                                                                                                       | 5   |
| 79 | Delcroix, E.                                                                                                     | 2003 |                                                                                                                                                                                                                                                                                                           |                                                                                                                                                                                                                                                 |     |
| 80 | Deflorio, M., Aida Aprea, Aldo Correrio, Nicoletta Santamaria and Gregorio De Metrio                             | 2005 | Incidental captures of sea turtles by swordfish and albacore longlines in the Ionian sea                                                                                                                                                                                                                  | Fisheries Science                                                                                                                                                                                                                               | 71  |
| 81 | Canadian Dept. of Fisheries and Oceans                                                                           | 2002 | Report on Sea Turtle Interactions in the 2001 Pelagic Longline Fishery.                                                                                                                                                                                                                                   |                                                                                                                                                                                                                                                 |     |
| 82 | di Natale, A., A. Mangano, A. Maurizi, L. Montaldo, E. Navarra, S. Pinca, G. Schimmenti, G. Torchia, M. Valastro | 1995 | A review of driftnet catches by the Italian fleet: species composition, observers data, and distribution along the net                                                                                                                                                                                    | Col. Vol. Sci. Pap. ICCAT                                                                                                                                                                                                                       | 44  |
| 83 | Domingo, A., Sales G, Giffoni B,                                                                                 | 2006 | Captura incidental de tortugas con palangre pelagico en el atlantico por las flotas de Brasil y Uruguay.                                                                                                                                                                                                  | Col. Vol. Sci. Pap. ICCAT                                                                                                                                                                                                                       | 59  |
| 84 | Miller P, Laporta M, and M. G Domingo                                                                            | 2008 | ANZUELOS CIRCULARES VS. ANZUELOS "J" EN LA FLOTA PALANGRERA URUGUAYA                                                                                                                                                                                                                                      |                                                                                                                                                                                                                                                 |     |
| 85 | Domingo, Andres, Caren Barcelo, Yonat Swimmer, Maite Pons, Philip Miller                                         | 2009 | Anzuelos circulares vs. anzuelos "J" en la flota palangrera uruguayaya                                                                                                                                                                                                                                    | Collect. Vol. Sci. Pap. ICCAT<br>CREA, editor. VII Simposio sobre medio ambiente: Estado<br>Actual y Perspectivas de la Investigacion y Conservacion<br>de las Tortugas Marinas en las Costas del Pacifico Sur<br>Oriental, Antofagasta, Chile. | 64  |
| 86 | Donoso, M. and P. H. Dutton                                                                                      | 2007 | Distribucion y abundancia relativa de tortugas marinas capturadas incidentalmente por la flota palangrera industrial chilena de pez espada en el Pacifico Sur Oriental. Page<br>Sea turtle bycatch in the Chilean pelagic longline fishery in the southeastern Pacific: Opportunities for<br>conservation | Biological Conservation                                                                                                                                                                                                                         | 143 |

|     |                                                                                                                                                 |      |                                                                                                                                    |                                                                                                                                    |    |
|-----|-------------------------------------------------------------------------------------------------------------------------------------------------|------|------------------------------------------------------------------------------------------------------------------------------------|------------------------------------------------------------------------------------------------------------------------------------|----|
| 88  | Echwikihi, Khaled, Imed Jribi, Mohamed Nejmeddine Bradai, Abderrahmen Bouain                                                                    | 2010 | Gillnet fishery - loggerhead turtle interactions in the Gulf of Gabes, Tunisia                                                     | Herpetological Journal                                                                                                             | 20 |
| 89  | Echwikihi, K., I Jribi, M.N. Bradai, and A. Bouain                                                                                              | 2010 | Effect of type of bait on pelagic longline fishery - loggerhead turtle interactions in the Gulf of Gabes (Tunisia)                 | Aquatic Conservation: Marine and Freshwater Ecosystems                                                                             | 20 |
| 90  | Eckert, S. A. and L. Sarti M.                                                                                                                   | 1997 | Distant fisheries implicated in the loss of the world's largest leatherback nesting population.                                    | Marine Turtle Newsletter                                                                                                           | 78 |
| 91  | Epperly, S., J. Braun, A. J. Chester, F. A. Cross, J. V. Merriner, and P. A. A. Tester.                                                         | 1995 | Winter distribution of sea turtles in the vicinity of Cape Hatteras and their interactions with the summer flounder trawl fishery. | Bulletin of Marine Science                                                                                                         | 56 |
| 92  | Epperly, S., L. Avens, L. Garrison, T. Henwood, W. Hoggard, J. Mitchell, J. Nance, J. Poffenberger, C. Sasso, E. Scott-Denton, and C. Yeung     | 2002 | Analysis of Sea Turtle Bycatch in the Commercial Shrimp Fisheries of Southeast U.S. Waters and the Gulf of Mexico.                 | NOAA Technical Memorandum NMFS-SEFSC-490<br>NMFS Southeast Fisheries Science Center Technical Memorandum, NMFS-SEFSC-539           |    |
| 93  | C. Fairfield-Walsh and L.P. Garrison                                                                                                            | 2006 | Estimated bycatch of marine mammals and turtles in the US Atlantic pelagic longline fleet during 2005                              | NMFS Southeast Fisheries Science Center Technical Memorandum, NMFS-SEFSC-560                                                       |    |
| 94  | C. Fairfield-Walsh and L.P. Garrison                                                                                                            | 2007 | Estimated bycatch of marine mammals and turtles in the US Atlantic pelagic longline fleet during 2006                              | Proceedings of the Twenty-Third Annual Symposium on Sea Turtle Biology and Conservation. NOAA Technical Memorandum NMFS-SEFSC-536  |    |
| 95  | Fallabrino, Alejandro Lezama, Cecilia Miller, Philip                                                                                            | 2006 | Incidental capture of a leatherback turtle ( <i>Dermochelys coriacea</i> ) by artisanal fishermen off Valizas, Uruguay             |                                                                                                                                    |    |
| 96  | Food and Agriculture Organization of the United Nations (FAO).                                                                                  | 2001 | Tropical shrimp fisheries and their impact on living resources.                                                                    | FAO Fisheries Circular No. 974                                                                                                     |    |
| 97  | Fennessy, S.T., and B. Isaksen                                                                                                                  | 2007 | Can bycatch reduction devices be implemented successfully on prawn trawlers in the Western Indian Ocean                            | African Journal of Marine Science                                                                                                  | 29 |
| 98  | Ferreira R.L., Martins H.R., Silva A.A., Bolten A.B.                                                                                            | 2001 | Impact of swordfish fisheries on sea turtles in the Azores.                                                                        | Arquipelago. Life and Marine Sciences                                                                                              | 18 |
| 99  | Fortuna, C.M., C. Vallini, E. Filidei Jr., M. Ruffino, I. Consalvo, S. Di Muccio, C. Gion, U. Scacco, E. Tarulli, O. Giovanardi, and A. Mazzola | 2010 | By-catch of cetaceans and other species of conservation concern during pair trawl fishing operations in the Adriatic Sea (Italy)   | Chemistry and Ecology (Suppl.)                                                                                                     | 26 |
| 100 | Fromentin, J.-M., and H. Farrugio                                                                                                               | 2005 | Results of the 2003 observer program on board the french purse seiner targeting Atlantic bluefin tuna in the Mediterranean Sea     | ICCAT                                                                                                                              | 58 |
| 101 | Galeana-Villasenor, Ildefonso, Felipe Galvan-Magana, Heriberto Santana-Hernandez                                                                | 2009 | Pesca con anzuelos en barcos palangreros del Oceano Pacifico mexicano: efectos en la captura y peso de tiburones y otras especies  | Revista de Biología Marina y Oceanografía                                                                                          | 44 |
| 102 | B.J. Gallaway                                                                                                                                   | 2001 | Leatherback sea turtles and the California/Oregon Drift Gillnet Fishery                                                            |                                                                                                                                    |    |
| 103 | Garrison, L.P.                                                                                                                                  | 2003 | Estimated bycatch of marine mammals and turtles in the U.S. Atlantic pelagic longline fishery during 2001-2002.                    | NOAA technical Memorandum NOAA Fisheries-SEFSC-515                                                                                 |    |
| 104 | Garrison, L.                                                                                                                                    | 2003 | Protected species interactions with the directed shark gillnet fishery of Florida and Georgia from 1999-2002                       | NMFS Southeast Fishery Science Center<br>NMFS Southeast Fisheries Science Center Technical Memorandum                              |    |
| 105 | Garrison, L.P.                                                                                                                                  | 2003 | Estimated Bycatch of marine mammals and turtles in the US atlantic pelagic longline fleet during 2001-2002                         |                                                                                                                                    |    |
| 106 | Lance Garrison                                                                                                                                  | 2003 | Protected Species Interactions with the directed shark gillnet fishery of Florida and Georgia from 1992-2002                       | SEFSC, Miami Laboratory<br>NMFS Southeast Fisheries Science Center Technical Memorandum, NMFS-SEFSC-527                            |    |
| 107 | L.P. Garrison and P.M. Richards                                                                                                                 | 2004 | Estimated bycatch of marine mammals and turtles in the US atlantic pelagic longline fleet during 2003                              | NMFS Southeast Fisheries Science Center Technical Memorandum, NMFS-SEFSC-531                                                       |    |
| 108 | L.P. Garrison                                                                                                                                   | 2005 | Estimated bycatch of marine mammals and turtles in the US atlantic pelagic longline fleet during 2004                              | NMFS Southeast Fisheries Science Center Technical Memorandum, NMFS-SEFSC-531                                                       |    |
| 109 | L.P. Garrison                                                                                                                                   | 2005 | Estimated bycatch of marine mammals and turtles in the US atlantic pelagic longline fleet during 2004                              |                                                                                                                                    |    |
| 110 | Garrison, Lance P., Lesley Stokes and Carol Fairfield                                                                                           | 2009 | Estimated Bycatch of Marine Mammals and Sea Turtles in the US Atlantic Pelagic Longline Fleet During 2008                          | NOAA Technical Memorandum NMFS-SEFSC-591<br>UNEP; Regional Activity Centre for Specially Protected Areas (RAC/SPA). Tunis, Tunisia |    |
| 111 | G. Gerosa and P. Casale                                                                                                                         | 1999 | Interaction of Marine Turtles with Fisheries in the Mediterranean.                                                                 |                                                                                                                                    |    |

|     |                                                                                                                                       |      |                                                                                                                                                                                         |                                                                                                                                                                                                                                     |     |
|-----|---------------------------------------------------------------------------------------------------------------------------------------|------|-----------------------------------------------------------------------------------------------------------------------------------------------------------------------------------------|-------------------------------------------------------------------------------------------------------------------------------------------------------------------------------------------------------------------------------------|-----|
| 112 | Giffoni, Bruno de Barros, Gilberto Sales, Carlos Eduardo Neves Consulim, Fernando Niemeyer Fiedler, Fabiano Peppes, and Yonat Swimmer | 2005 | Experimento com anzol circular na zee brasileira e em aguas adjacentes para mitigar a captura de tartarugas marinhas na pescaria de espinhel pelagico                                   | III Reunión sobre la investigación y conservación de tortugas marinas del Atlántico Sur Occidental.                                                                                                                                 |     |
| 113 | Giffoni, B., A. Domingo, G. Sales, F. Niemeyer Fiedler, P. Miller                                                                     | 2008 | Interaccion de tortugas marinas (Caretta caretta y Dermochelys coriacea) con la pesca de palangre pelagico en el Atlantico Sudoccidental: una perspectiva regional para la conservacion | Collective Volumes of Scientific Papers for the International Commission for the Conservation of Atlantic Tunas                                                                                                                     | 6   |
| 114 | Gilman, E. (Ed.)                                                                                                                      | 2009 | Proceedings of the technical workshop on mitigating sea turtle bycatch in coastal net fisheries. 20-22 January 2009, Honolulu, USA                                                      | Western Pacific Regional Fishery Management council                                                                                                                                                                                 |     |
| 115 | Gilman, E., Ishazaki, A., Chang, D., Liu, W.Y., Dalzell, P. (Editors)                                                                 | 2011 | Proceedings of the fifth International Fishers Forum on Marine Spatial Planning and Bycatch Mitigation. Western Pacific Regional Fishery Management Council, Honolulu, USA              |                                                                                                                                                                                                                                     |     |
| 116 | Godley, B.J., Broderick, A.C., Campbell, L.M., Ranger, S., and Richardson, P.B.                                                       | 2004 | An Assessment of the Status and Exploitation of Marine Turtles in the UK Overseas Territories in the Wider Caribbean. Final Project Report                                              | Department of Environment, Food and Rural Affairs and the Foreign and Commonwealth Office. Reporte Tecnico Final presentado a Conservacion Internacional Colombia, Centro de Investigacion para el manejo ambiental y el desarrollo |     |
| 117 | Gomez-Cubillos, M. C., D. F. Amorocho, et al.                                                                                         | 2008 | Reduccion de la captura incidental de tortugas marinas en redes de pesca y espinel en la costa del Pacifico Colombiano.                                                                 | Reporte Tecnico Final presentado a Conservacion Internacional Colombia, Centro de Investigacion para el manejo ambiental y el desarrollo                                                                                            |     |
| 118 | Gopi, G.V., Pandav, B., Choudhury, B.C.                                                                                               | 2002 | A quantitative analysis of incidental capture of sea turtles and mortalities during commercial shrimp trawling along the coastal waters of Orissa                                       | Wildlife Institute of India                                                                                                                                                                                                         |     |
| 119 | Grace, Mark A., John Watson, and Dan Foster                                                                                           | 2010 | Time, Temperature, and Depth Profiles for a Loggerhead Sea Turtle (Caretta caretta) Captured With a Pelagic Longline                                                                    | Southeastern Naturalist                                                                                                                                                                                                             | 9   |
| 120 | Gribble, N.A., G. McPherson, and B. Lane                                                                                              | 1998 | Effect of the Queensland shark control program on non-target species: whale, dugong, turtle and dolphin: a review.                                                                      | Marine Freshwater Research                                                                                                                                                                                                          | 49  |
| 121 | Gueguen, F.                                                                                                                           | 2000 | Captures accidentelle de tortues marines par la flotile crevettiere de Guyane Francaise                                                                                                 | Bull. Soc. Herp. Fr                                                                                                                                                                                                                 | 93  |
| 122 | Hale, L.F., L.D. Hollensead, and J.K. Carlson                                                                                         | 2007 | Characterization of the shark bottom longline fishery: 2007                                                                                                                             | NMFS Tech Memo (SEFSC)                                                                                                                                                                                                              | 564 |
| 123 | Hale, LF, SJB Gulak, and JK Carlson                                                                                                   | 2010 | Characterization of the shark bottom longline fishery, 2009                                                                                                                             | NOAA Technical Memorandum NMFS-SEFSC-596                                                                                                                                                                                            |     |
| 124 | Hamann, M., C. Limpus, G. Hughes, J. Mortimer, and N. Pilcher.                                                                        | 2006 | Assessment of the conservation status of the leatherback turtle in the Indian Ocean and South East Asia.                                                                                | IOSEA Marine Turtle Memorandum of Understanding.                                                                                                                                                                                    |     |
| 125 | Carlos R. Hasbun and Mauricio Vasquez                                                                                                 | 1999 | Sea Turtles of El Slavador                                                                                                                                                              | Marine Turtle Newsletter                                                                                                                                                                                                            | 85  |
| 126 | Hobsbawn PI and Wilson DT                                                                                                             | 2010 | Australian National Report to the Scientific Committee of the Indian Ocean Tuna Commission for 2009                                                                                     | Report to the Indian Ocean Tuna Commission                                                                                                                                                                                          |     |
| 127 | Hodgson, A., H. Marsh, S. Delean, and L. Marcus                                                                                       | 2007 | Is attempting to change marine mammal behaviour a generic solution to the bycatch problem? A dugong case study                                                                          | Animal Conservation                                                                                                                                                                                                                 | 10  |
| 128 | Honig, M. B., S. L. Petersen, and A. Duart                                                                                            | 2007 | The impact of pelagic longline fisheries on sea turtles in the Benguela Current Large Marine Ecosystem.                                                                                 | S. Petersen, D. Nel, and A. Ouardien, editors. Towards an Ecosystem Approach to Longline Fisheries in Benguela: An assessment of impacts on seabirds, sea turtles and sharks.                                                       |     |
| 129 | Huang, H.-W., and K.-M. Liu                                                                                                           | 2010 | Bycatch and discards by Taiwanese large-scale tuna longline fleets in the Indian Ocean                                                                                                  | Fisheries Research                                                                                                                                                                                                                  | 106 |
| 130 | Huang, Hsiang Wen                                                                                                                     | 2010 | Report of the Taiwanese observer program for large-scale tuna longline fisheries in the Atlantic Ocean in 2007                                                                          | Collect. Vol. Sci. Pap. ICCAT                                                                                                                                                                                                       | 65  |
| 131 | Huang, Hsiang Wen and Kwang-ming Liu                                                                                                  | 2010 | Bycatch and discards by Taiwanese large-scale tuna longline fleets in the Indian Ocean                                                                                                  | Fisheries Research                                                                                                                                                                                                                  | 106 |
| 132 | Humphrey, S. and A. Wilson, eds.                                                                                                      | 2005 | Recent News from the WWF Africa and Madagascar Marine Turtle Programme                                                                                                                  | Marine Turtle Update                                                                                                                                                                                                                |     |
| 133 | Hurtado, Mario                                                                                                                        | 1991 | Captura de tortugas marinas durante las faenas de pesca artesanal en el Ecuador                                                                                                         | Comision Permanente del Pacifico Sur                                                                                                                                                                                                | 19  |
| 134 | International Fishers Forum                                                                                                           | 2002 | Proceedings of the Second International Fishers Forum, November 19-22, 2002. Noreen M. Parks, ed.                                                                                       |                                                                                                                                                                                                                                     |     |
| 135 | International Fishers Forum                                                                                                           | 2006 | Proceedings of the International Tuna Fishers Conference on Responsible Fisheries & Third International Fishers Forum, July 25-29, 2005.                                                |                                                                                                                                                                                                                                     |     |
| 136 | Indian Ocean Tuna Commission                                                                                                          | 2006 | Report of the Second Session of the IOTC Working Party on Bycatch Seychelles, 31 July - 1 August 2006.                                                                                  |                                                                                                                                                                                                                                     |     |

|     |                                                                                                                                                                    |      |                                                                                                                                                                                           |                                                                                                                                                                                                                  |     |
|-----|--------------------------------------------------------------------------------------------------------------------------------------------------------------------|------|-------------------------------------------------------------------------------------------------------------------------------------------------------------------------------------------|------------------------------------------------------------------------------------------------------------------------------------------------------------------------------------------------------------------|-----|
| 137 | IOTC EU Commission directorate--<br>general for maritime affairs and<br>fisheries<br>Ishihara, Takashi, Naoki Kamezaki,<br>Yoshimasa Matsuzawa, Futoshi<br>Iwamoto | 2010 | Rapport de l'union europeenne pour le comite scientifique de la CTOI de 2010                                                                                                              | IOTC-2010-SC-Inf05                                                                                                                                                                                               |     |
| 138 |                                                                                                                                                                    | 2011 | Reentry of Juvenile and Subadult Loggerhead Turtles into Natal Waters of Japan                                                                                                            | Current Herpetology<br>NMFS Southeast Fishery Science Center Technical<br>Memorandum, NMFS-SEFSC-418                                                                                                             | 30  |
| 139 | D.R. Johnson, C. Yeung, C.A. Brown<br>Imed Jribi, Khaled Echwikhi,<br>Mohamed Nejmeddine Bradai and<br>Abderrhmen Bouain                                           | 1999 | Estimates of marine mammal and marine turtle bycatch by the US atlantic pelagic longline fleet in 1992-1997                                                                               |                                                                                                                                                                                                                  |     |
| 140 |                                                                                                                                                                    | 2008 | Incidental capture of sea turtles by longlines in the Gulf of Gabes (South Tunisia): A comparative study between<br>bottom and surface longlines                                          | Scientia Marina                                                                                                                                                                                                  | 72  |
| 141 | F. Julian and M. Beeson                                                                                                                                            | 1998 | Estimates of marine mammal, turtle, and seabird mortality for two California gillnet fisheries: 1990-1995                                                                                 | Fishery Bulletin                                                                                                                                                                                                 |     |
| 142 | Kapantagakis, A. and L. Lioudakis.                                                                                                                                 | 2006 | Sea turtle by-catch in the greek drifting long line fishery.                                                                                                                              | Twenty Sixth Annual Symposium on Sea Turtle Biology and<br>Conservation. Book of Abstracts. Frick, M., A.<br>Panagopoulou, A.F. Rees, and K. Williams, eds.<br>International Sea Turtle Society, Athens, Greece. |     |
| 143 | Kaplan, I.C.                                                                                                                                                       | 2005 | A risk assessment for Pacific leatherback turtles ( <i>Dermochelys coriacea</i> ).                                                                                                        | Canadian Journal of Fisheries and Aquatic Science.                                                                                                                                                               | 62  |
| 144 | Keinath, J.A., D.E. Barnard, J.A.<br>Musick, and B.A. Bell, eds.<br>Shaleyla Kelez Sara, Camelia<br>Manrique Bravo and Ximena Velez-<br>Zuazo                      | 1996 | Proceedings of the 15th Annual Symposium on Sea Turtle Biology and Conservation - 20-25 February 1995,<br>Hilton Head, SC                                                                 | NOAA Technical Memorandum NMFS-SEFSC-387                                                                                                                                                                         |     |
| 145 |                                                                                                                                                                    | 2006 | Shark longline fishery and sea turtles in Peruvian waters                                                                                                                                 | Western and Central Pacific Fisheries Commission<br>Scientific Committee Third Regular Session 13-24 August<br>2007 Honolulu, HI                                                                                 |     |
| 146 | Kim, S.S., D.H. An, D.Y. Moon, and<br>S.J. Hwang                                                                                                                   | 2007 | Comparison of Circle Hook and J Hook Catch Rate for Target and Bycatch Species Taken in the Korean Tuna<br>Longline Fishery During 2005-2006                                              | Workshop Proceedings: 13-15 November 2006, Mayotte,<br>France                                                                                                                                                    |     |
| 147 | Kiszka, J. and C. Muir, eds.                                                                                                                                       | 2007 | Incidental catch of non-targeted marine species in the Western Indian Ocean: problems and mitigation<br>measures.                                                                         | NMFS Pacific Islands Fishery Science Center Technical<br>Memorandum, NMFS-PIFSC-4                                                                                                                                |     |
| 148 | D.R. Kobayashi and J.J. Polovina<br>Kotas, J.E., S. dos Santos, V.G. de<br>Azevedo, B.M.G. Gallo, & P.C.R.                                                         | 2005 | Evaluation of Time-area Closures to Reduce Incidental Sea Turtle Take in the Hawaii-based Longline Fishery:<br>Generalized Additive Model (GAM) Development and Retrospective Examination |                                                                                                                                                                                                                  |     |
| 149 | Barata<br>Largacha, E., Parrales, M., Rendon,<br>L., Velasquez, V., Orozco, M., & Hall,<br>M.                                                                      | 2004 | Incidental capture of loggerhead ( <i>Caretta caretta</i> ) and leatherback ( <i>Dermochelys coriacea</i> ) sea turtles by the<br>pelagic longline fishery off southern Brazil            | Fish. Bull.                                                                                                                                                                                                      | 102 |
| 150 |                                                                                                                                                                    | 2005 | Working with the Ecuadorian fishing community to reduce the mortality of sea turtles in longlines: the first year<br>March 2004-March 2005                                                | Western Pacific Regional Fisheries Management Council<br>Report, March 2005                                                                                                                                      |     |
| 151 | Laurent                                                                                                                                                            | 1999 | Assessing marine turtle bycatch in European drifting longline and trawl fisheries for identifying fishing<br>regulations                                                                  | EUROPEAN MARINE TURTLE PROJECT, PROTOCOL<br>MANUAL, PROJECT EC-DG XIV-98/008                                                                                                                                     |     |
| 152 | Laurent, L., Caminas, J.A., Casale, P.,<br>Delforio, M., DeMetrio, G.,<br>Kapantagakis, A., Margaritoulis, D.<br>Politou, C-Y, Valeiras, J.                        | 2001 | Assessing marine turtle bycatch in European drifting longline and trawl fisheries for identifying fishing<br>regulations                                                                  | Project-EC-DG Fisheries 98-008. EU Commission Report,<br>Joint project of BIOINSIGHT, IEO, IMBC, STPS and<br>University of Bari.                                                                                 |     |
| 153 | Lawson, T.                                                                                                                                                         | 2001 | Observer data held by the oceanic fisheries programme covering tuna fishery bycatches in the Western and<br>Central Pacific Ocean                                                         | Standing Committee on Tuna and Billfish SWG-9                                                                                                                                                                    |     |
| 154 | Lazar, B., V. Ziza, and N. Tvrtkovic                                                                                                                               | 2006 | Interactions of gillnet fishery with loggerhead sea turtles <i>Caretta caretta</i> in the Northern Adriatic Sea.                                                                          | Twenty Sixth Annual Symposium on Sea Turtle Biology and<br>Conservation. Book of Abstracts. Frick, M., A.<br>Panagopoulou, A.F. Rees, and K. Williams, eds.<br>International Sea Turtle Society, Athens, Greece. |     |
| 155 | Nilamon de Oliveira Leite Jr., Carlos<br>Eduardo Stein, João Carlos Alciati<br>Thomé, Tatiana Neves                                                                | 2006 | MONITORAMENTO DA PESCA DE CURRICO E ESPINHEL DE SUPERFÍCIE NA LOCALIDADE DE ITAIPAVA/ES E SUA<br>INTERAÇÃO COM TARTARUGAS E AVES MARINHAS.                                                | II Jornada de Conservação e Pesquisa de Tartarugas<br>Marinhas no Atlântico Sul Ocidental<br>14 e 15 de Novembro de 2005 - Praia do Cassino, Brasil                                                              |     |
| 156 | Cecilia Lezama, Philip Miller,<br>Alejandro Fallabrino                                                                                                             | 2003 | Informe Final. IMPACTO DE LA PESQUERÍA ARTESANAL URUGUAYA EN LAS POBLACIONES DE<br>TORTUGAS MARINAS                                                                                       |                                                                                                                                                                                                                  |     |

|     |                                                                                                                                       |      |                                                                                                                                                                                                             |                                                                                                                                                  |     |
|-----|---------------------------------------------------------------------------------------------------------------------------------------|------|-------------------------------------------------------------------------------------------------------------------------------------------------------------------------------------------------------------|--------------------------------------------------------------------------------------------------------------------------------------------------|-----|
| 157 | Cecilia Lezama, Mariana Ríos, Matías Feijóo, Diana Pérez-Etcheverry, Andrés Estrades                                                  | 2006 | ANÁLISIS PRELIMINAR DEL IMPACTO DE LA PESQUERÍA ARTESANAL SOBRE Chelonia mydas EN LOS BAJOS DEL SOLÍS, URUGUAY                                                                                              | II Jornada de Conservação e Pesquisa de Tartarugas Marinhas no Atlântico Sul Ocidental<br>14 e 15 de Novembro de 2005 - Praia do Cassino, Brasil |     |
| 158 | Livingstone, S. R., and R. J. Downie                                                                                                  | 2006 | Trinidad's leatherbacks: The net cost? Pages 254-255 in Book of Abstracts. Twenty Sixth Annual Symposium on Sea Turtle Biology and Conservation. International Sea Turtle Society, Athens, Greece.          |                                                                                                                                                  |     |
| 159 | Lopez-Mendilaharsu M, Bauza A, Laporta M, Caraccio MN, Lezama C, Calvo V, Hernandez M, Estrades A, Aisenberg A, Fallabrino A.         | 2003 | Review and conservation of sea turtles in Uruguay.                                                                                                                                                          | Final Report: British Petroleum Conservation Programme & National Fish and Wildlife Foundation                                                   |     |
| 160 | Lopez-Mendilaharsu M, Bauza A, Laporta M, Caraccio MN, Lezama C, Calvo V, Hernandez M, Estrades A, Aisenberg A, Fallabrino A.         | 2003 | Review and conservation of sea turtles in Uruguay.                                                                                                                                                          | Final Report: British Petroleum Conservation Programme & National Fish and Wildlife Foundation                                                   |     |
| 161 | Lopez-Mendilaharsu, M., G. Sales, B. Giffoni, P. Miller, F. Niemeyer Fiedler, and A. Domingo.                                         | 2007 | Distribucion y composicion de tallas de las tortugas marinas (Caretta caretta y Dermochelys coriacea) que interactuan con el palangre pelagico en el Atlantico Sur. Col. Vol. Sci. Pap. ICCAT 60:2094-2109. |                                                                                                                                                  |     |
| 162 | Lum, Lori Lee                                                                                                                         | 2006 | Assessment of incidental sea turtle catch in the artisanal gillnet fishery in Trinidad and Tobago, West Indies                                                                                              | Applied Herpetology                                                                                                                              | 3   |
| 163 | Lynch                                                                                                                                 | 2003 | Australia BFT and billfish                                                                                                                                                                                  |                                                                                                                                                  |     |
| 164 | H.M. Madarie                                                                                                                          | 2006 | Estimated By-Catch bythe Coastal Fishing Fleet of Surinam                                                                                                                                                   | World Wildlife Fund                                                                                                                              |     |
| 165 | Camelia Manrique Bravo, Shaleyla Kelez and Ximena Velez-Zuazo                                                                         | 2006 | Impact of the common dolphin fish longline fishery on sea turtles along the Peruvian coast between 2003 and 2005                                                                                            |                                                                                                                                                  |     |
| 166 | Mansfield, Katherine                                                                                                                  | 2006 | Sources of mortality, movements and behavior of sea turtles in Virginia                                                                                                                                     | The College of William and Mary-- dissertation                                                                                                   |     |
| 167 | Marcano, L.A. & Alio M., J.J.                                                                                                         | 1998 | Incidental capture of sea turtles by the industrial shrimping fleet off northeastern Venezuela                                                                                                              | Proceedings from the XXth Annual Symposium on Sea Turtle Biology and Conservation                                                                |     |
| 168 | Marcano, Luis A., Freddy Arocha, Jose Alio, Jesus Marcano, X. Gutierrez, and G. Vizcaino                                              | 2010 | Actividades desarrolladas en el programa de investigacion intensiva sobre marlines en Venezuela. Periodo 2007-2008                                                                                          | Collect. Vol. Sci. Pap. ICCAT                                                                                                                    | 65  |
| 169 | Marcovaldi, M.A. & TAMAR Marcovaldi, M.A., G. Sales, J.C.A. Thome, A.C.C. Dias da Silva, B.M.G. Gallo, E.H.S. Lima, E.P. Lima, and C. | 2005 | The leatherback sea turtle in Brazil                                                                                                                                                                        | Presentation given at CCC Atlantic leatherback working group meeting, St. Catherine's, GA, USA                                                   |     |
| 170 | Bellini                                                                                                                               | 2006 | Sea turtles and fishery interactions in Brazil: identifying and mitigating potential conflicts.                                                                                                             | Marine Turtle Newsletter                                                                                                                         | 112 |
| 171 | Marcovaldi, M.A. & TAMAR Margaritoulis, D. and A.                                                                                     | 2005 | The leatherback sea turtle in Brazil                                                                                                                                                                        | Presentation given at CCC Atlantic leatherback working group meeting, St. Catherine's, GA, USA                                                   |     |
| 172 | Demetropoulos, eds.                                                                                                                   | 2003 | Proceedings of the First Mediterranean Conference on Marine Turtles. Barcelona Convention - Bern Convention - Bonn Convention. Rome, 24-28 October 2001.                                                    |                                                                                                                                                  |     |
| 173 | M.L. McCracken                                                                                                                        | 2004 | Modeling a very rare event to estimate sea turtle bycatch: lessons learned                                                                                                                                  | NMFS Pacific Islands Fishery Science Center Technical Memorandum, NMFS-PIFSC-3                                                                   |     |

|     |                                                                                                                                                                       |      |                                                                                                                                                                                                                                  |                                                                                                                                                   |      |
|-----|-----------------------------------------------------------------------------------------------------------------------------------------------------------------------|------|----------------------------------------------------------------------------------------------------------------------------------------------------------------------------------------------------------------------------------|---------------------------------------------------------------------------------------------------------------------------------------------------|------|
| 174 | McCracken, M.L.                                                                                                                                                       | 2004 | Modeling a very rare event to estimate sea turtle bycatch: lessons learned                                                                                                                                                       | NMFS Pacific Islands Fishery Science Center Technical Memorandum                                                                                  |      |
| 175 | Mejuto, J., Garcia-Cortes, B., Ramos-Cartelle, A., Ariz, J.                                                                                                           | 2007 | Preliminary overall estimations of bycatch landed by the Spanish surface longline fleet targeting swordfish ( <i>Xiphias gladius</i> ) in the Pacific Ocean and interactions with marine turtles and sea birds: years 1990-2005. | Working group on bycatch. 6th Meeting. La Jolla, California (USA) 9-10 February 2007. Document BYC-6-INF A                                        |      |
| 176 | P. Miller, M. Laporta, A. Fallabrino, and P. Sanchez                                                                                                                  | 2004 | Tortugas marinas y la pesca de arrastre costero en el estuario del Plata: Qué está ocurriendo aqui?                                                                                                                              | Libro de resúmenes II Reunión sobre la investigación y conservación de tortugas marinas del Atlántico Sur Occidental.                             |      |
| 177 | Miller, P., Domingo, A., Laporta, M. & Fallabrino, A.                                                                                                                 | 2005 | Leatherback turtles and the Uruguayan fisheries                                                                                                                                                                                  | Presentation at the CCC Atlantic leatherback working group meeting, St. Catherine's, GA, USA                                                      |      |
| 178 | Philip Miller, Martin Laporta, Andres Domingo, Cecilia Lezama, and Mariana Rios                                                                                       | 2006 | BYCATCH ASSESSMENT OF SEA TURTLES BY A COASTAL BOTTOM TRAWL FISHERY ON THE RIO DE LA PLATA ESTUARY, URUGUAY                                                                                                                      | 26th Annual Symposium on Sea Turtle Biology and Conservation Book of Abstracts                                                                    | 1815 |
| 179 | Danielle S. Monteiro<br>Leandro Bugoni<br>Sérgio C. Estima<br>Tiago B.R. Gandra                                                                                       | 2006 | A pescaria de emalhe de superfície direcionada à captura de tubarões-martelo e a interação com tartarugas marinhas no litoral norte do Rio Grande do Sul                                                                         | II Jornada de Conservação e Pesquisa de Tartarugas Marinhas no Atlântico Sul Occidental. 14 e 15 de Novembro de 2005. Praia do Cassino, Brasil    |      |
| 180 | Danielle S. Monteiro, Sérgio C. Estima, Samara P. Junqueira, Leandro Bugoni, Tiago B.R. Gandra                                                                        | 2006 | OCORRÊNCIA DE <i>Chelonia mydas</i> E INTERAÇÃO COM A PESCA ARTESANAL NO INTERIOR DO ESTUÁRIO DA LAGOA DOS PATOS - RS                                                                                                            | II Jornada de Conservação e Pesquisa de Tartarugas Marinhas no Atlântico Sul Occidental<br>14 e 15 de Novembro de 2005 - Praia do Cassino, Brasil |      |
| 181 | Moon, D-Y                                                                                                                                                             | 2003 | Bycatch in Korean tuna fisheries in the western and central Pacific Ocean based on the scientific observations                                                                                                                   | International Technical Expert Workshop on Marine Turtle Bycatch in Longline Fisheries                                                            |      |
| 182 | Marine Resources Assessment Group, Ltd. (MRAG)                                                                                                                        | 2008 | Field study to assess some mitigation measures to reduce bycatch of marine turtles in surface longline fisheries.                                                                                                                | Reference No. FISH/2005/28A - Service Contract SI2.439703 "Assessment of Turtle Bycatch"                                                          |      |
| 183 | Mug, Moises, Martin hall, and Nick Vogel                                                                                                                              | 2008 | Bycatch Initiative: Eastern Pacific Programme -- A vehicle towards sustainable fisheries                                                                                                                                         | WWF/IATTC                                                                                                                                         |      |
| 184 | K.T. Murray                                                                                                                                                           | 2006 | Estimated Average Annual Bycatch of Loggerhead Sea Turtles ( <i>Caretta caretta</i> ) in US Mid-Atlantic Bottom Otter Trawl Gear, 1996-2004                                                                                      | NMFS Northeast Fisheries Science Center Reference Document, 06-19                                                                                 |      |
| 185 | K.T. Murray                                                                                                                                                           | 2007 | Estimated Bycatch of Loggerhead Sea Turtles ( <i>Caretta caretta</i> ) in U.S. Mid-Atlantic Scallop Trawl Gear, 2004-2005, and in Scallop Dredge Gear, 2005                                                                      | NMFS Northeast Fisheries Science Center, Reference Document                                                                                       | 7    |
| 186 | National Marine Fisheries Service                                                                                                                                     | 2004 | Endangered Species Act - Section 7 Consultation. Biological Opinion. Reinitiation of consultation on the Atlantic Pelagic Longline Fishery for highly migratory species.                                                         |                                                                                                                                                   |      |
| 187 | NMFS                                                                                                                                                                  | 2006 | Final Environment Assessment and Regulatory Impact Review Regulatory Flexibility Act Analysis of Sea Turtle Conservation Measures for the Pound Net Fishery in Virginia Waters of the Chesapeake Bay                             |                                                                                                                                                   |      |
| 188 | National Marine Fisheries Service, Pacific Islands Region, Sustainable Fisheries Division                                                                             | 2010 | Endangered Species Act -- Section 7 Consultation, Biological Opinion                                                                                                                                                             |                                                                                                                                                   |      |
| 189 | Ocean Fisheries Programme - Secretariat of the Pacific Community                                                                                                      | 2001 | A review of turtle by-catch in the western and central Pacific Ocean tuna fisheries                                                                                                                                              | A report for the South Pacific Regional Environment Programme                                                                                     |      |
| 190 | Pacheco, JC, DW Kerstetter, FH Hazin, Humberto Hazin, RSSL Segundo, JE Graves, F Carvalho, PE Travassos                                                               | 2009 | A comparison of circle hook and J hook performance in a western equatorial Atlantic Ocean pelagic longline fishery                                                                                                               | Fisheries Research                                                                                                                                | 107  |
| 191 | Panou, A., Antypas, G., Giannopoulos, Y., Moschonas, S., Mourelatos, D., Mourelatos, G., Mourelatos, C., Toumazatos, P., Tselentis, L, Voutsinas, N., & Voutsinas, V. | 1992 | Incidental catches of loggerhead turtles, <i>Caretta caretta</i> , in swordfish longlines in the Ionian Sea, Greece                                                                                                              | Testudo                                                                                                                                           | 3    |
| 192 | Panou, A.Tselentis, L., Voutsinas, N., Mourelatos, Ch., Kaloupi, S., Voutsinas, V., & Moschonas, S.                                                                   | 1999 | Incidental catches of marine turtles in surface long line fishery in the Ionian Sea, Greece                                                                                                                                      | Contributions to the Zoogeography and Ecology of the Eastern Mediterranean Region                                                                 | 1    |
| 193 | Passerotti, Michelle S., John K. Carlson, Simon JB Gulak                                                                                                              | 2009 | Catch and bycatch in US Southeast Gillnet Fisheries, 2009                                                                                                                                                                        | NOAA Technical Memorandum NMFS-SEFSC-600                                                                                                          |      |

|     |                                                                                                                     |      |                                                                                                                                                                                                                                                                                                                                                                              |                                                                                                                                                             |     |
|-----|---------------------------------------------------------------------------------------------------------------------|------|------------------------------------------------------------------------------------------------------------------------------------------------------------------------------------------------------------------------------------------------------------------------------------------------------------------------------------------------------------------------------|-------------------------------------------------------------------------------------------------------------------------------------------------------------|-----|
|     | Peckham, Hoyt S.<br>Maldonado, David<br>Walli, Andreas<br>Ruiz, Georgita                                            |      |                                                                                                                                                                                                                                                                                                                                                                              |                                                                                                                                                             |     |
| 194 | Crowder, Larry B.                                                                                                   | 2007 | Small-scale fisheries bycatch jeopardizes endangered Pacific loggerhead turtles                                                                                                                                                                                                                                                                                              | PloS One                                                                                                                                                    |     |
| 195 | Perez J.A.A, Wahrlich R.                                                                                            | 2005 | A bycatch of the gillnet monkfish <i>Lophius gastrophysus</i> fishery off southern Brazil                                                                                                                                                                                                                                                                                    | Fisheries Research                                                                                                                                          | 72  |
| 196 | Petersen, S.                                                                                                        | 2005 | Initial bycatch assessment: South Africa's domestic longline fisher, 2000-2003                                                                                                                                                                                                                                                                                               | BirdLife South Africa                                                                                                                                       |     |
| 197 | Petersen, S.<br>Samantha Petersen and Steve                                                                         | 2005 | Incidental mortality of seabirds, turtles and sharks: A review of data collected east of 20 degrees by South African observers                                                                                                                                                                                                                                               | First Meeting of the IOTC Bycatch Working Party - Phuket, 20 July 2005                                                                                      |     |
| 198 | Kirkman                                                                                                             | 2005 | Initial bycatch assessment: demersal longline fishery July 2000-November 2004                                                                                                                                                                                                                                                                                                | BirdLife South Africa                                                                                                                                       |     |
| 199 | Samantha Petersen<br>Petersen, Samantha L., Maria B<br>Honig, Peter G Ryan, Les G                                   | 2005 | Incidental mortality of seabirds, turtles and sharks: A Review of data collected east of 20 degrees by South African observers                                                                                                                                                                                                                                               | BirdLife South Africa<br>WWF South Africa Report Series -- Understanding and Mitigating Vulnerable Bycatch in southern African Trawl and Longline Fisheries |     |
| 200 | Underhill, and Ronel Nel<br>Phillips, E.M., H.M. Nevins, S.A.<br>Hatch, A.M. Ramey, M.A. Miller,<br>and J.T. Harvey | 2010 | Turtle bycatch in the pelagic longline fishery off Southern Africa                                                                                                                                                                                                                                                                                                           |                                                                                                                                                             |     |
| 201 |                                                                                                                     | 2010 | Seabird bycatch in Alaska demersal longline fishery trials: A demographic summary                                                                                                                                                                                                                                                                                            | Marine Ornithology                                                                                                                                          | 38  |
| 202 | Pinedo, M.C. & Polacheck, T.<br>Piovano, Susanna, Yonat Swimmer,<br>and Cristina Giacoma                            | 2004 | Sea turtle by-catch in pelagic longline sets off southern Brazil                                                                                                                                                                                                                                                                                                             | Biological Conservation                                                                                                                                     | 119 |
| 203 |                                                                                                                     | 2009 | Are circle hooks effective in reducing incidental captures of loggerhead sea turtles in a Mediterranean longline fishery?                                                                                                                                                                                                                                                    | Aquatic Conservation: Marine and Freshwater Ecosystems                                                                                                      | 19  |
| 204 | Pacific Islands Regional Office<br>(NMFS)                                                                           | 2011 | Pacific Islands Regional Observer Program American Samoa Longline annual status report January 1, 2010 - December 31, 2010                                                                                                                                                                                                                                                   |                                                                                                                                                             |     |
| 205 | Pacific Islands Regional Office                                                                                     | 2005 | Hawaii Longline Observer Program Shallow Set Annual Status Report, January 1 - December 31, 2004                                                                                                                                                                                                                                                                             | NMFS Pacific Islands Regional Office Annual Status Report                                                                                                   |     |
| 206 | Pacific Islands Regional Office                                                                                     | 2006 | Pacific Islands Regional Observer Program Shallow Set Annual Status Report, January 1 - December 31, 2005                                                                                                                                                                                                                                                                    | NMFS Pacific Islands Regional Office Annual Status Report                                                                                                   |     |
| 207 | Pacific Islands Regional Office                                                                                     | 2007 | Pacific Islands Regional Observer Program Shallow Set Annual Status Report, January 1 - December 31, 2006<br>Pacific Islands Regional Observer Program Shallow Set Quarterly Status Report, January 1, 2007 - March 31, 2007; Pacific Islands Regional Observer Program Shallow Set Quarterly Status Report, April 1, 2007- June 30, 2007; Pacific Islands Regional Observer | NMFS Pacific Islands Regional Office Annual Status Report                                                                                                   |     |
| 208 | Pacific Islands Regional Office                                                                                     | 2007 |                                                                                                                                                                                                                                                                                                                                                                              | NMFS Pacific Islands Regional Office Quarterly Status Report                                                                                                |     |
| 209 | Poiner, I. R., and A. N. M. Harris                                                                                  | 1996 | Incidental capture, direct mortality and delayed mortality of sea turtles in Australia's Northern Prawn Fishery                                                                                                                                                                                                                                                              | Marine Biology<br>Global Change: Mankind-Marine Environment Interactions, Proceedings of the 13th French-Japanese Oceanography Symposium                    | 125 |
| 210 | Poisson, Francois                                                                                                   | 2011 | Catch, Bycatch of Sharks, and Incidental Catch of Sea Turtles in the Reunion-based Longline Swordfish Fishery (Southwest Indian Ocean) Between 1997 and 2002                                                                                                                                                                                                                 |                                                                                                                                                             |     |
| 211 | Pons, M.                                                                                                            | 2008 | Machine Learning Procedures: An application to bycatch data...                                                                                                                                                                                                                                                                                                               | x                                                                                                                                                           |     |
| 212 | Pons, Maite, Soledad Marroni, Irene<br>Machado, Badih Ghattas, and<br>Andres Domingo                                | 2009 | Machine learning procedures: an application to by-catch data of the marine turtles <i>Caretta caretta</i> in the Southwestern Atlantic Ocean                                                                                                                                                                                                                                 | Collect. Vol. Sci. Pap. ICCAT<br>Fishery Resource Grant: 06-FEG-02. ESA Scientific Research Permit #1563.                                                   | 64  |
| 213 | Price, B and C Van Salsbuy                                                                                          | 2007 | Low-Profile Gillnet Testing in the Deep Water Region of Pamlico Sound, NC.<br>Evaluations of turtle excluder device (TED) performance in US southeast Atlantic and Gulf of Mexico skimmer trawl fisheries                                                                                                                                                                    |                                                                                                                                                             |     |
| 214 | Price, Blake, and Jeff Gearhart                                                                                     | 2011 |                                                                                                                                                                                                                                                                                                                                                                              | NOAA Technical Memorandum NMFS - SEFSC - 615                                                                                                                |     |
| 215 | ProDelphinus<br>Rees, A.F., M. Frick, A.<br>Panagopoulou and K. Williams,<br>compilers                              | 2010 | Final Programmatic Report Narrative                                                                                                                                                                                                                                                                                                                                          | National Fish and Wildlife Foundation                                                                                                                       |     |
| 216 |                                                                                                                     | 2008 | Proceedings of the twenty-seventh annual symposium on sea turtle biology and conservation NOAA Technical Memorandum NMFS-SEFSC-572                                                                                                                                                                                                                                           | NOAA Technical Memorandum NMFS-SEFSC-572                                                                                                                    |     |
| 217 | Richards, P.M.                                                                                                      | 2007 | Estimated Takes of Protected Species in the Commercial Directed Shark Bottom Longline Fisher 2003,2004 and 2005                                                                                                                                                                                                                                                              | National Marine Fisheries Service                                                                                                                           |     |
| 218 | Richards,P.M.                                                                                                       | 2007 | Estimated Takes of Protected Species in the Commercial Directed Shark Bottom Longline Fisher 2006.                                                                                                                                                                                                                                                                           | National Marine Fisheries Service<br>Proceedings of the Western Pacific Sea Turtle Cooperative Research and Management Workshop                             |     |
| 219 | Robins, C.<br>C. M. Robins, A. M. Goodspeed, I. R.                                                                  | 2002 | Fishers and sea turtle research                                                                                                                                                                                                                                                                                                                                              |                                                                                                                                                             |     |
| 220 | Poiner and B. D. Harch                                                                                              | 2002 | Monitoring the Catch of Turtles in Northern Prawn Fishery                                                                                                                                                                                                                                                                                                                    |                                                                                                                                                             |     |



|     |                                                                                                                                     |      |                                                                                                                                                                                                                                                                 |                                                                                                                                                                                                                                                                                     |     |
|-----|-------------------------------------------------------------------------------------------------------------------------------------|------|-----------------------------------------------------------------------------------------------------------------------------------------------------------------------------------------------------------------------------------------------------------------|-------------------------------------------------------------------------------------------------------------------------------------------------------------------------------------------------------------------------------------------------------------------------------------|-----|
|     | Rodriguez, Claudia<br>Vaca, Diana                                                                                                   |      |                                                                                                                                                                                                                                                                 |                                                                                                                                                                                                                                                                                     |     |
| 221 | Caicedo, Dalila                                                                                                                     | 2002 | Programa nacional para la conservacion de las tortugas marinas y continentales en Colombia                                                                                                                                                                      |                                                                                                                                                                                                                                                                                     |     |
| 222 | Rogan, E. and M. Mackey                                                                                                             | 2007 | Megafauna bycatch in drift nets for albacore tuna in the NE Atlantic                                                                                                                                                                                            | Fisheries Research                                                                                                                                                                                                                                                                  | 86  |
|     | Rosales, Carlos A., Manuel Vera,<br>and Jorge Llanos                                                                                | 2010 | Varamientos y captura incidental de tortugas marinas en el litoral de Tumbes, Peru                                                                                                                                                                              | Rev. peru biol.                                                                                                                                                                                                                                                                     | 17  |
| 224 | Rueda, J.V.                                                                                                                         | 1990 | Dying Turtles in Colombian Waters Still a Mystery                                                                                                                                                                                                               | Marine Turtle Newsletter                                                                                                                                                                                                                                                            | 50  |
|     | Rueda, L., R. J. Sagarmínaga, J. C.<br>Baez, J. A. Caminas, S. A. Eckert, and<br>C. Boggs                                           | 2006 | Testing mackerel bait as a possible bycatch mitigation measure for the Spanish Mediterranean swordfish longlining fleet. Page 262 in Book of Abstracts. Twenty Sixth Annual Symposium on Sea Turtle Biology and Conservation. International Sea Turtle Society, |                                                                                                                                                                                                                                                                                     |     |
| 226 | Ruiz-Slater, M., and J. Acevedo                                                                                                     | 2006 | Reporte final del proyecto "Estimación de la Tasa de Captura Incidental de Tortugas Marinas en las Actividades de Pesca Ribereña en la Costa de Michoacán". Gobierno de Michoacán, Fondo Ecológico Banamex.                                                     | In: L. Prosdocimi, D. Albareda, S. Rodriguez Heredia, S. Moron, & J.L. Di Paola (eds). II Reunion sobre la investigacion y conservacion de tortugas marinas del atlantico sur occidental. Journal of the Marine Biological Association of the United Kingdom, 2008, 88(4), 853-864. |     |
| 227 | Sales, G., B.B. Giffoni, P.C.R. Barata,<br>& G. Maurutto                                                                            | 2004 | Interacao de tartarugas marinhas com a pesca de espinhel pelagico na costa brasileira - 1999 - 2003                                                                                                                                                             | Journal of the Marine Biological Association of the United Kingdom, 2008, 88(4), 853-864.                                                                                                                                                                                           |     |
| 228 | Sales, G, BB Giffoni, & PCR Barata                                                                                                  | 2008 | Incidental capture of sea turtles by the Brazilian pelagic longline fishery                                                                                                                                                                                     |                                                                                                                                                                                                                                                                                     |     |
| 229 | Santana Hernandez, H. & Valdez<br>Flores, J.J.                                                                                      | 2003 | La captura incidental en pesqueria de palangre del Pacifico oriental mexicano, con enfasis en tortugas marinas                                                                                                                                                  | Instituto Nacional de la Pesca, presentation, not a paper                                                                                                                                                                                                                           |     |
| 230 | Santana Hernandez, H. and J. J.<br>Valdez Flores                                                                                    | 2006 | Selectividad y eficiencia del palangre de deriva con tres tipos de anzuelo y dos tipos de carnada en la pesca de tiburón. SAGARPA. Instituto Nacional de la Pesca                                                                                               |                                                                                                                                                                                                                                                                                     |     |
| 231 | Santos, R.C.A., Soto, J.M.R.                                                                                                        | 2004 | Manejo de tartarugas verdes-Chelonia mydas (Linnaeus, 1758) capturadas em redes de pesca artesanal na Ilha de Santa Catarina, Brasil                                                                                                                            | II Reunion sobre la investigacion y conservacion de tortugas marinas del Atlantico Sur Occidental                                                                                                                                                                                   |     |
| 232 | Mac V. Rawson                                                                                                                       | 1997 | Fisheries Bycatch Consequences and Management                                                                                                                                                                                                                   | University of Alaska Sea Grant College Program                                                                                                                                                                                                                                      |     |
| 233 | Segura, A. & Arauz, R.                                                                                                              | 1995 | By-catch capture of sea turtles by two kinds of experimental longline gears in Pacific Costa Rica waters                                                                                                                                                        |                                                                                                                                                                                                                                                                                     |     |
| 234 | Shanker, K.                                                                                                                         | 2004 | Marine turtle status and conservation in the Indian Ocean                                                                                                                                                                                                       |                                                                                                                                                                                                                                                                                     |     |
| 235 | Silvani, L., M. Gazo, and A. Aguilar<br>Soto, Jules M.R., and Rodrigo C. P.                                                         | 1999 | Spanish driftnet fishing and incidental catches in the western Mediterranean                                                                                                                                                                                    | Biological Conservation                                                                                                                                                                                                                                                             | 90  |
| 236 | Beheregaray                                                                                                                         | 1997 | Chelonia mydas in the northern region of the Patos lagoon, South Brazil                                                                                                                                                                                         | Marine Turtle Newsletter                                                                                                                                                                                                                                                            | 77  |
|     |                                                                                                                                     |      |                                                                                                                                                                                                                                                                 | Seminoff, J.A., compiler. 2003. Proceedings of the Twenty-Second Annual Symposium on Sea Turtle Biology and Conservation. NOAA Technical Memorandum NMFS-SEFSC-503                                                                                                                  |     |
| 237 | Soto, Jules M.R., Thiago Z. Serafini,<br>and Arthur A.O. Celini                                                                     | 2003 | Sea turtle mortality in pelagic driftnets off the southern Brazilian coast                                                                                                                                                                                      |                                                                                                                                                                                                                                                                                     |     |
| 238 | Sumpton, W.D., S.M. Taylor, N.A.<br>Gribble, G. McPherson, and T. Ham                                                               | 2011 | Gear selectivity of large-mesh nets and drumlines used to catch sharks in the Queensland Shark Control Program                                                                                                                                                  | African Journal of Marine Science                                                                                                                                                                                                                                                   | 33  |
| 239 | Swimmer, Yonat, Jenny Suter,<br>Randall Arauz, Keith Bigelow,<br>Andres Lopez, Ilena Zanela, Alan<br>Bolanos, Jorge Ballester, Raul | 2011 | Sustainable fishing gear: the case of modified circle hooks in a Costa Rican longline fishery                                                                                                                                                                   | Marine biology                                                                                                                                                                                                                                                                      | 158 |
| 240 | Suarez, John Wang, Cristofer Boggs<br>Taiwan observer data                                                                          | 2000 | "Sea turtle by-catchment"                                                                                                                                                                                                                                       |                                                                                                                                                                                                                                                                                     |     |
| 241 | L. Trent, D.E. Parshley and J.K.<br>Carlson                                                                                         | 1997 | Catch and Bycatch of the Shark Gillnet Fishery Off Georgia and East Florida                                                                                                                                                                                     | Marine Fisheries Review                                                                                                                                                                                                                                                             | 59  |
| 242 | Tudela                                                                                                                              | 2000 | Ecosystem Effects of fishing in the Mediterranean: An analysis of the major threats of fishing gear and practices to biodiversity and marine habitats                                                                                                           | FAO Fisheries Department                                                                                                                                                                                                                                                            |     |
| 243 | Tudela, S., A. Kai Kai, F. Maynou, El<br>Andalossi and P. Guglielmi                                                                 | 2005 | Driftnet fishing and biodiversity conservation: the case study of the large-scale Moroccan driftnet fleet operating in the Alboran Sea (SW Mediterranean)                                                                                                       | Biological Conservation                                                                                                                                                                                                                                                             | 121 |
| 244 | Ulloa-Ramirez, P<br>Gonzalez-Ania, L.V.                                                                                             | 1998 | Incidence of marine turtles in the Mexican long-line tuna fishery in the Gulf of Mexico                                                                                                                                                                         | 18th International Symposium on Sea Turtle Biology and Conservation                                                                                                                                                                                                                 |     |
| 245 | Varghese, Sijo, S. Varghese and V.S.<br>Somvanshi                                                                                   | 2010 | Impact of tuna longline fishery on sea turtles of Indian seas                                                                                                                                                                                                   | Current Science                                                                                                                                                                                                                                                                     | 98  |

|     |                                                                                                                                                                                 |      |                                                                                                                                                          |                                                                                                                                                                                             |    |
|-----|---------------------------------------------------------------------------------------------------------------------------------------------------------------------------------|------|----------------------------------------------------------------------------------------------------------------------------------------------------------|---------------------------------------------------------------------------------------------------------------------------------------------------------------------------------------------|----|
| 246 | Watson, J., C. Bergmann, A. Shah, D. Foster, and S. Epperly                                                                                                                     | 2004 | Evaluation of 18/0 circle hooks in the Gulf of Mexico tuna fishery                                                                                       | Reports on Experiments conducted in 2004. Unpublished SEFSC report                                                                                                                          |    |
| 247 | Watson, JW et al                                                                                                                                                                | 2005 | Fishing methods to reduce sea turtle mortality associated with pelagic longlines                                                                         | Canadian Journal of Fisheries and Aquatic Sciences 62:965-981 (2005)                                                                                                                        |    |
| 248 | Wetherall, J.A., Balazs, G.H., Tokunaga, R.A., and Y.Y. Yong                                                                                                                    | 1993 | Bycatch of Marine Turtles in North Pacific High-Seas Driftnet Fisheries and Impacts on the Stocks.                                                       | INPFC Symposium on biology, distribution and stock assessment of species caught in the high seas driftnet fisheries in the North Pacific Ocean. J. Ito et al. (eds.). Bulletin No. 53 (III) |    |
| 249 | White, Michael, Idriz Haxhiu, Enerit Sacdanaku, Lazon Petritaj, Merita Rumano, Fundime Osmani, Blerina Vrenozi, Prue Robinson, Stephanos Kouris, Liza Boura, and Lily Venizelos | 2009 | Monitoring and conservation of important sea turtle feeding grounds in the Patok area of Albania, 2008-2010                                              |                                                                                                                                                                                             |    |
| 250 | Whoriskey, Sophie, Randall Arauz, and Julia K. Baum                                                                                                                             | 2011 | Potential impacts of emerging mahi-mahi fisheries on sea turtle and elasmobranch bycatch species                                                         | Biological Conservation                                                                                                                                                                     |    |
| 251 | W.N. Witzell                                                                                                                                                                    | 1999 | Distribution and relative abundance of sea turtles caught incidentally by the U.S. pelagic longline fleet in the western North Atlantic Ocean, 1992-1995 | Fishery Bulletin                                                                                                                                                                            | 97 |
| 252 | Western Pacific Regional Fishery Council                                                                                                                                        | 2007 | North Pacific Loggerhead Sea Turtle Expert Workshop, December 19-20 2007                                                                                 | WCPFC, NOAA                                                                                                                                                                                 |    |
| 253 | Xiaojie, D. and X. Liuxiong                                                                                                                                                     | 2003 | Marine Turtles Caught by China Longline Fishery in the Mediterranean Sea and Atlantic Ocean                                                              |                                                                                                                                                                                             |    |
| 254 | C. Yeung                                                                                                                                                                        | 1999 | Estimates of marine mammal and marine turtle bycatch by the US Atlantic pelagic longline fleet in 1998                                                   | NMFS Southeast Fisheries Science Center Technical Memorandum, NMFS-SEFSC-430                                                                                                                |    |
| 255 | C. Yeung                                                                                                                                                                        | 2001 | Estimates of marine mammal and marine turtle bycatch by the US Atlantic pelagic longline fleet in 1999-2000                                              | NMFS Southeast Fisheries Science Center Technical Memorandum, NMFS-SEFSC-467                                                                                                                |    |
| 256 | Yokota, Kosuke, Masashi Kiyota, Hiroshi Okamura                                                                                                                                 | 2009 | Effect of bait species and color on sea turtle bycatch and fish catch in a pelagic longline fishery                                                      | Fisheries Research                                                                                                                                                                          | 97 |
| 257 | Zainudin, Imam Musthofa, Lida Pet-Soede, Creusa Hitipeuw, and Windya Adnyana                                                                                                    | 2007 | Interaction of Sea Turtles with Indonesian Fisheries -- Preliminary Findings                                                                             | Indian Ocean Turtle Newsletter                                                                                                                                                              | 6  |
| 258 | Zeeberg, J., A. Corten, and E. de Graaf                                                                                                                                         | 2006 | Bycatch and release of pelagic megafauna in industrial trawler fisheries of Northwest Africa                                                             | Fisheries Research                                                                                                                                                                          | 78 |
